# Supplementary material for: Infectious Aerosol Capture Mask as Environmental Control to Reduce Spread of Respiratory Viral Particles
Source: MDPI journal article supplement (doi:10.3390/v14061275), 2022-06-11
Supplement: s1 [file s1]

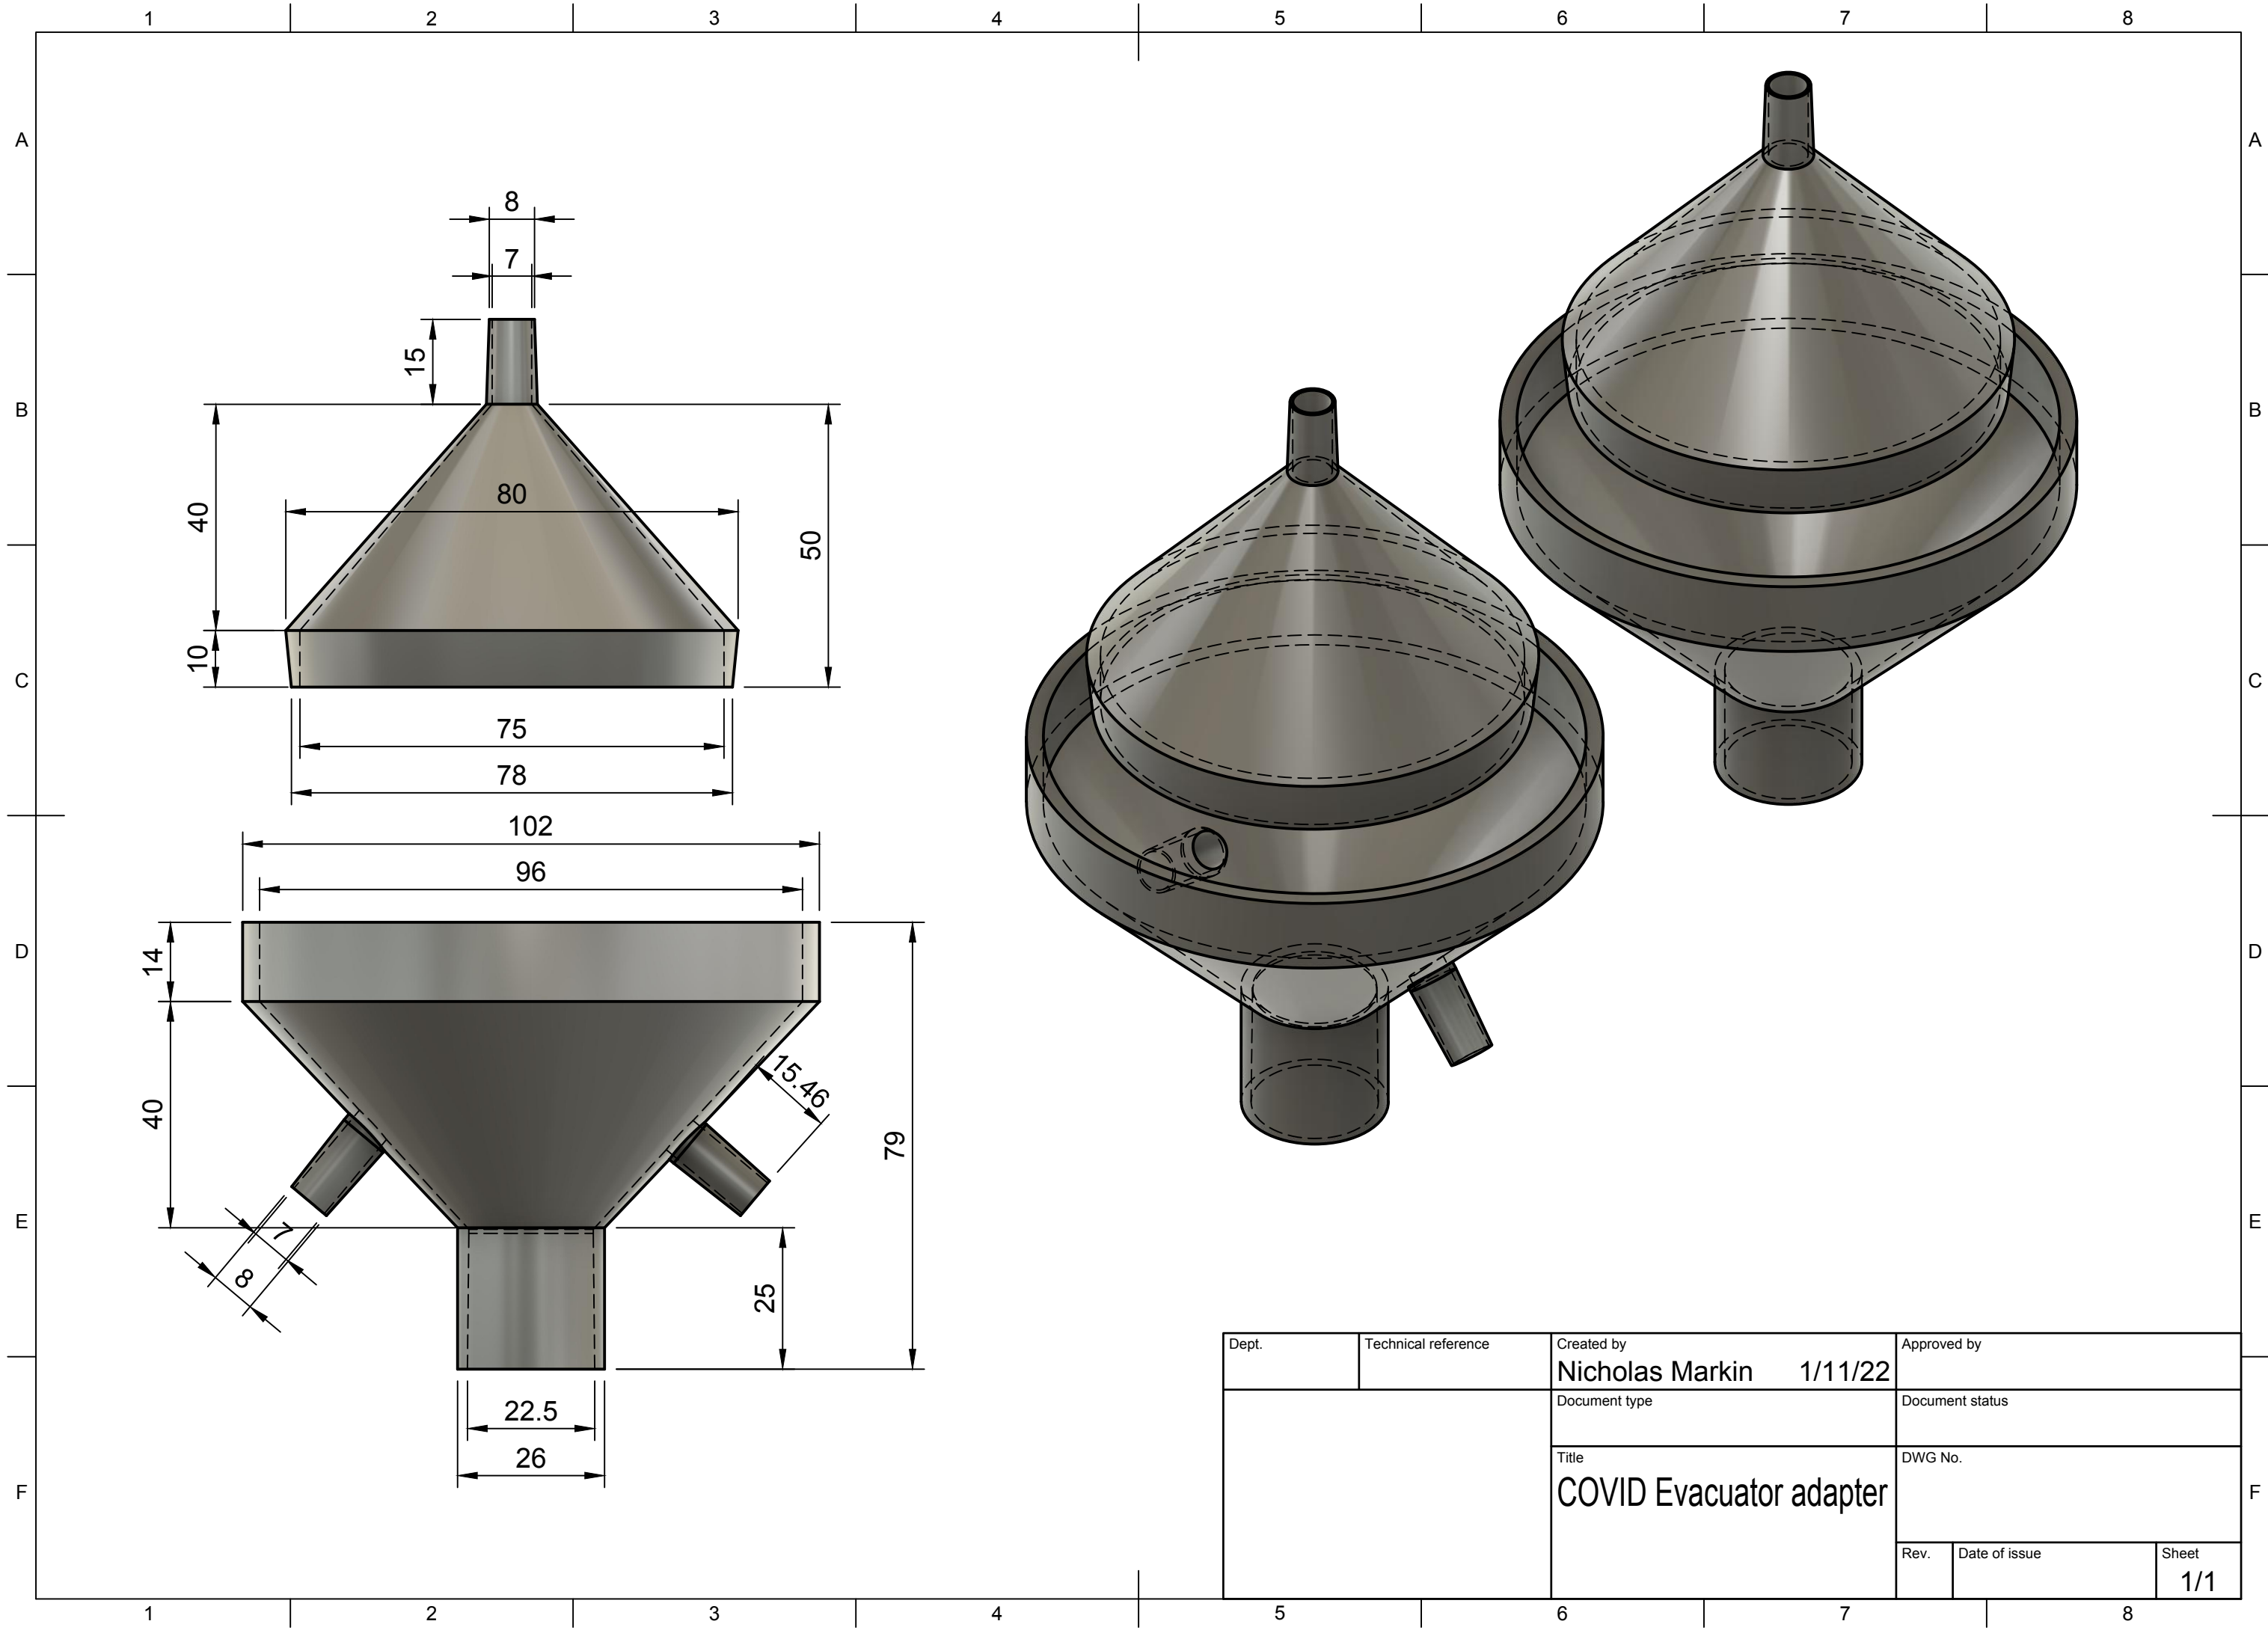

|       |                     |                                       |                 |               |
|-------|---------------------|---------------------------------------|-----------------|---------------|
| Dept. | Technical reference | Created by<br>Nicholas Markin 1/11/22 | Approved by     |               |
|       |                     | Document type                         | Document status |               |
|       |                     | Title<br>COVID Evacuator adapter      | DWG No.         |               |
|       |                     |                                       | Rev.            | Date of issue |
|       |                     |                                       | Sheet<br>1/1    |               |
