# Supplementary material for: Infectious Aerosol Capture Mask as Environmental Control to Reduce Spread of Respiratory Viral Particles
Source: Viruses. 2022 Jun 11;14(6):1275. doi: 10.3390/v14061275 (PMC9227466; doi:10.3390/v14061275)
Supplement: Supplementary file 1 [file viruses-14-01275-s001.zip › Table S1.xlsx]

## Sheet: .1um Mouth Breathing
	Injection 01						Injection 02						Injection 03
	.1um Mouth Breathing with total of 25 Injection points						.1um Mouth Breathing with total of 50 Injection points						.1um Mouth Breathing with total of 100 Injection points
	Trajectories	Length [m]	Residence time [s]	Fate			Trajectories	Length [m]	Residence time [s]	Fate			Trajectories	Length [m]	Residence time [s]	Fate
	#1 (-6.946e-04 m; -0.065 m; 0.103 m)	0.0880783	0.059	Opening			#1 (-6.946e-04 m; -0.066 m; 0.103 m)	0.0876343	0.06	Opening			#1 (-6.946e-04 m; -0.066 m; 0.103 m)	0.0875475	0.06	Opening
	#2 (-0.003 m; -0.065 m; 0.103 m)	0.0877239	0.062	Opening			#2 (-0.003 m; -0.066 m; 0.103 m)	0.0873031	0.063	Opening			#2 (-0.002 m; -0.066 m; 0.103 m)	0.0873406	0.062	Opening
	#3 (-0.005 m; -0.065 m; 0.103 m)	0.0872968	0.07	Opening			#3 (-0.005 m; -0.066 m; 0.103 m)	0.0869291	0.072	Opening			#3 (-0.003 m; -0.066 m; 0.103 m)	0.0871525	0.065	Opening
	#4 (-0.007 m; -0.065 m; 0.103 m)	0.0868355	0.088	Opening			#4 (-0.007 m; -0.066 m; 0.103 m)	0.0865371	0.091	Opening			#4 (-0.005 m; -0.066 m; 0.103 m)	0.0869189	0.071	Opening
	#5 (-0.010 m; -0.065 m; 0.103 m)	0.0875089	0.132	Opening			#5 (-0.009 m; -0.066 m; 0.103 m)	0.0869916	0.134	Opening			#5 (-0.006 m; -0.066 m; 0.103 m)	0.0866875	0.079	Opening
	#6 (-0.012 m; -0.065 m; 0.103 m)	0.0888042	0.207	Opening			#6 (-0.011 m; -0.066 m; 0.103 m)	0.0880907	0.201	Opening			#6 (-0.007 m; -0.066 m; 0.103 m)	0.0864602	0.093	Opening
	#7 (-0.014 m; -0.065 m; 0.103 m)	0.0905141	0.283	Opening			#7 (0.001 m; -0.066 m; 0.103 m)	0.0875973	0.063	Opening			#7 (-0.009 m; -0.066 m; 0.103 m)	0.0864968	0.118	Opening
	#8 (0.002 m; -0.065 m; 0.103 m)	0.0880378	0.062	Opening			#8 (0.004 m; -0.066 m; 0.103 m)	0.0872511	0.07	Opening			#8 (-0.010 m; -0.066 m; 0.103 m)	0.0870414	0.151	Opening
	#9 (0.004 m; -0.065 m; 0.103 m)	0.0876105	0.069	Opening			#9 (0.006 m; -0.066 m; 0.103 m)	0.086665	0.088	Opening			#9 (6.150e-04 m; -0.066 m; 0.103 m)	0.0876204	0.061	Opening
	#10 (0.006 m; -0.065 m; 0.103 m)	0.0869162	0.086	Opening			#10 (0.008 m; -0.066 m; 0.103 m)	0.0875011	0.122	Opening			#10 (0.002 m; -0.066 m; 0.103 m)	0.0874607	0.064	Opening
	#11 (0.008 m; -0.065 m; 0.103 m)	0.0874273	0.122	Opening			#11 (0.010 m; -0.066 m; 0.103 m)	0.0907751	0.169	Opening			#11 (0.003 m; -0.066 m; 0.103 m)	0.0872535	0.069	Opening
	#12 (0.010 m; -0.065 m; 0.103 m)	0.0912125	0.174	Opening			#12 (0.012 m; -0.066 m; 0.103 m)	0.0948458	0.264	Opening			#12 (0.005 m; -0.066 m; 0.103 m)	0.0869404	0.077	Opening
	#13 (0.013 m; -0.065 m; 0.103 m)	0.0956958	0.275	Opening			#13 (-6.946e-04 m; -0.064 m; 0.103 m)	0.0885563	0.058	Opening			#13 (0.006 m; -0.066 m; 0.103 m)	0.0865932	0.09	Opening
	#14 (4.097e-04 m; -0.061 m; 0.103 m)	0.0905612	0.064	Opening			#14 (-0.003 m; -0.064 m; 0.103 m)	0.0882016	0.061	Opening			#14 (0.007 m; -0.066 m; 0.103 m)	0.0866708	0.109	Opening
	#15 (-0.002 m; -0.061 m; 0.103 m)	0.0902248	0.064	Opening			#15 (-0.005 m; -0.064 m; 0.103 m)	0.0877484	0.068	Opening			#15 (0.008 m; -0.066 m; 0.103 m)	0.0881779	0.133	Opening
	#16 (-0.004 m; -0.061 m; 0.103 m)	0.0896545	0.067	Opening			#16 (-0.007 m; -0.064 m; 0.103 m)	0.0872343	0.083	Opening			#16 (0.010 m; -0.066 m; 0.103 m)	0.0902619	0.162	Opening
	#17 (-0.006 m; -0.061 m; 0.103 m)	0.0888849	0.076	Opening			#17 (-0.009 m; -0.064 m; 0.103 m)	0.0874734	0.121	Opening			#17 (0.011 m; -0.066 m; 0.103 m)	0.092437	0.206	Opening
	#18 (-0.008 m; -0.061 m; 0.103 m)	0.0880388	0.1	Opening			#18 (-0.011 m; -0.064 m; 0.103 m)	0.0895696	0.186	Opening			#18 (0.012 m; -0.066 m; 0.103 m)	0.0946463	0.289	Opening
	#19 (-0.011 m; -0.061 m; 0.103 m)	0.0892002	0.151	Opening			#19 (-0.014 m; -0.064 m; 0.103 m)	0.0904494	0.263	Opening			#19 (-3.982e-05 m; -0.065 m; 0.103 m)	0.0883891	0.058	Opening
	#20 (-0.013 m; -0.061 m; 0.103 m)	0.0916939	0.203	Opening			#20 (0.001 m; -0.064 m; 0.103 m)	0.088514	0.061	Opening			#20 (-0.001 m; -0.065 m; 0.103 m)	0.0881517	0.059	Opening
	#21 (0.003 m; -0.061 m; 0.103 m)	0.0899878	0.069	Opening			#21 (0.004 m; -0.064 m; 0.103 m)	0.0880901	0.068	Opening			#21 (-0.003 m; -0.065 m; 0.103 m)	0.0879526	0.061	Opening
	#22 (0.005 m; -0.061 m; 0.103 m)	0.0891878	0.077	Opening			#22 (0.006 m; -0.064 m; 0.103 m)	0.0873222	0.082	Opening			#22 (-0.004 m; -0.065 m; 0.103 m)	0.0877029	0.064	Opening
	#23 (0.007 m; -0.061 m; 0.103 m)	0.0881676	0.1	Opening			#23 (0.008 m; -0.064 m; 0.103 m)	0.0872891	0.113	Opening			#23 (-0.005 m; -0.065 m; 0.103 m)	0.087429	0.07	Opening
	#24 (0.009 m; -0.061 m; 0.103 m)	0.0901495	0.136	Opening			#24 (0.010 m; -0.064 m; 0.103 m)	0.0907562	0.162	Opening			#24 (-0.007 m; -0.065 m; 0.103 m)	0.0871475	0.079	Opening
	#25 (0.011 m; -0.061 m; 0.103 m)	0.00394589	0.043	Opening			#25 (0.012 m; -0.064 m; 0.103 m)	0.0951337	0.244	Opening			#25 (-0.008 m; -0.065 m; 0.103 m)	0.0868427	0.096	Opening
		Total Filtration		1			#26 (-6.946e-04 m; -0.062 m; 0.103 m)	0.0897492	0.061	Opening			#26 (-0.009 m; -0.065 m; 0.103 m)	0.0873062	0.122	Opening
							#27 (-0.003 m; -0.062 m; 0.103 m)	0.0892935	0.063	Opening			#27 (-0.011 m; -0.065 m; 0.103 m)	0.0885389	0.158	Opening
							#28 (-0.005 m; -0.062 m; 0.103 m)	0.0887343	0.068	Opening			#28 (-0.012 m; -0.065 m; 0.103 m)	0.0891212	0.207	Opening
							#29 (-0.007 m; -0.062 m; 0.103 m)	0.0880627	0.082	Opening			#29 (-0.013 m; -0.065 m; 0.103 m)	0.0898644	0.254	Opening
							#30 (-0.009 m; -0.062 m; 0.103 m)	0.0875797	0.117	Opening			#30 (-0.014 m; -0.065 m; 0.103 m)	0.0911659	0.293	Opening
							#31 (-0.011 m; -0.062 m; 0.103 m)	0.0903254	0.169	Opening			#31 (0.001 m; -0.065 m; 0.103 m)	0.0882357	0.061	Opening
							#32 (-0.014 m; -0.062 m; 0.103 m)	0.0915575	0.238	Opening			#32 (0.003 m; -0.065 m; 0.103 m)	0.0880304	0.065	Opening
							#33 (0.001 m; -0.062 m; 0.103 m)	0.0896278	0.063	Opening			#33 (0.004 m; -0.065 m; 0.103 m)	0.0877245	0.07	Opening
							#34 (0.004 m; -0.062 m; 0.103 m)	0.0891143	0.069	Opening			#34 (0.005 m; -0.065 m; 0.103 m)	0.0872942	0.078	Opening
							#35 (0.006 m; -0.062 m; 0.103 m)	0.0881524	0.082	Opening			#35 (0.007 m; -0.065 m; 0.103 m)	0.0868871	0.092	Opening
							#36 (0.008 m; -0.062 m; 0.103 m)	0.0880622	0.111	Opening			#36 (0.008 m; -0.065 m; 0.103 m)	0.0870709	0.114	Opening
							#37 (0.010 m; -0.062 m; 0.103 m)	0.00211534	0.019	Opening			#37 (0.009 m; -0.065 m; 0.103 m)	0.0892026	0.142	Opening
							#38 (0.012 m; -0.062 m; 0.103 m)	0.09553	0.235	Opening			#38 (0.010 m; -0.065 m; 0.103 m)	0.0913508	0.175	Opening
							#39 (-6.946e-04 m; -0.060 m; 0.103 m)	0.0913917	0.069	Opening			#39 (0.012 m; -0.065 m; 0.103 m)	0.0938753	0.225	Opening
							#40 (-0.003 m; -0.060 m; 0.103 m)	0.0908546	0.069	Opening			#40 (0.013 m; -0.065 m; 0.103 m)	0.0957762	0.319	Opening
							#41 (-0.005 m; -0.060 m; 0.103 m)	0.0900925	0.072	Opening			#41 (-6.946e-04 m; -0.063 m; 0.103 m)	0.0891382	0.059	Opening
							#42 (-0.007 m; -0.060 m; 0.103 m)	0.0891328	0.085	Opening			#42 (-0.002 m; -0.063 m; 0.103 m)	0.0888709	0.06	Opening
							#43 (-0.009 m; -0.060 m; 0.103 m)	0.0884924	0.123	Opening			#43 (-0.003 m; -0.063 m; 0.103 m)	0.0886414	0.062	Opening
							#44 (-0.011 m; -0.060 m; 0.103 m)	0.0902937	0.172	Opening			#44 (-0.005 m; -0.063 m; 0.103 m)	0.0883168	0.066	Opening
							#45 (-0.014 m; -0.060 m; 0.103 m)	0.0920866	0.213	Opening			#45 (-0.006 m; -0.063 m; 0.103 m)	0.0879794	0.072	Opening
							#46 (0.001 m; -0.060 m; 0.103 m)	0.0912085	0.071	Opening			#46 (-0.007 m; -0.063 m; 0.103 m)	0.0876041	0.083	Opening
							#47 (0.004 m; -0.060 m; 0.103 m)	0.0904573	0.075	Opening			#47 (-0.009 m; -0.063 m; 0.103 m)	0.0872224	0.103	Opening
							#48 (0.006 m; -0.060 m; 0.103 m)	0.0894244	0.086	Opening			#48 (-0.010 m; -0.063 m; 0.103 m)	0.0879894	0.132	Opening
							#49 (0.008 m; -0.060 m; 0.103 m)	0.0896335	0.117	Opening			#49 (-0.011 m; -0.063 m; 0.103 m)	0.0897715	0.166	Opening
							#50 (0.010 m; -0.060 m; 0.103 m)	0.00185717	0.022	Opening			#50 (-0.012 m; -0.063 m; 0.103 m)	0.0906316	0.213	Opening
								Total Filtration		1			#51 (-0.014 m; -0.063 m; 0.103 m)	0.0910617	0.255	Opening
													#52 (6.150e-04 m; -0.063 m; 0.103 m)	0.0892024	0.06	Opening
													#53 (0.002 m; -0.063 m; 0.103 m)	0.0889522	0.063	Opening
													#54 (0.003 m; -0.063 m; 0.103 m)	0.0886868	0.066	Opening
													#55 (0.005 m; -0.063 m; 0.103 m)	0.0882506	0.073	Opening
													#56 (0.006 m; -0.063 m; 0.103 m)	0.0876804	0.083	Opening
													#57 (0.007 m; -0.063 m; 0.103 m)	0.0872527	0.1	Opening
													#58 (0.008 m; -0.063 m; 0.103 m)	0.0882635	0.121	Opening
													#59 (0.010 m; -0.063 m; 0.103 m)	0.0904481	0.152	Opening
													#60 (0.011 m; -0.063 m; 0.103 m)	0.0928982	0.191	Opening
													#61 (0.012 m; -0.063 m; 0.103 m)	0.095698	0.249	Opening
													#62 (-3.982e-05 m; -0.062 m; 0.103 m)	0.0903334	0.062	Opening
													#63 (-0.001 m; -0.062 m; 0.103 m)	0.090018	0.063	Opening
													#64 (-0.003 m; -0.062 m; 0.103 m)	0.089716	0.064	Opening
													#65 (-0.004 m; -0.062 m; 0.103 m)	0.089404	0.066	Opening
													#66 (-0.005 m; -0.062 m; 0.103 m)	0.0889794	0.07	Opening
													#67 (-0.007 m; -0.062 m; 0.103 m)	0.0885576	0.077	Opening
													#68 (-0.008 m; -0.062 m; 0.103 m)	0.0880588	0.091	Opening
													#69 (-0.009 m; -0.062 m; 0.103 m)	0.0877522	0.115	Opening
													#70 (-0.011 m; -0.062 m; 0.103 m)	0.0889917	0.147	Opening
													#71 (-0.012 m; -0.062 m; 0.103 m)	0.0908307	0.178	Opening
													#72 (-0.013 m; -0.062 m; 0.103 m)	0.0917131	0.216	Opening
													#73 (-0.014 m; -0.062 m; 0.103 m)	0.0921977	0.253	Opening
													#74 (0.001 m; -0.062 m; 0.103 m)	0.0900706	0.064	Opening
													#75 (0.003 m; -0.062 m; 0.103 m)	0.0897437	0.067	Opening
													#76 (0.004 m; -0.062 m; 0.103 m)	0.0893644	0.071	Opening
													#77 (0.005 m; -0.062 m; 0.103 m)	0.0887681	0.078	Opening
													#78 (0.007 m; -0.062 m; 0.103 m)	0.0880112	0.091	Opening
													#79 (0.008 m; -0.062 m; 0.103 m)	0.0885018	0.11	Opening
													#80 (0.009 m; -0.062 m; 0.103 m)	0.0897982	0.133	Opening
													#81 (0.010 m; -0.062 m; 0.103 m)	0.00187036	0.019	Opening
													#82 (0.012 m; -0.062 m; 0.103 m)	0.0947902	0.215	Opening
													#83 (0.013 m; -0.062 m; 0.103 m)	0.0983993	0.284	Opening
													#84 (-6.946e-04 m; -0.060 m; 0.103 m)	0.0915827	0.07	Opening
													#85 (-0.002 m; -0.060 m; 0.103 m)	0.0912952	0.07	Opening
													#86 (-0.003 m; -0.060 m; 0.103 m)	0.0909198	0.071	Opening
													#87 (-0.005 m; -0.060 m; 0.103 m)	0.0904309	0.072	Opening
													#88 (-0.006 m; -0.060 m; 0.103 m)	0.0898438	0.077	Opening
													#89 (-0.007 m; -0.060 m; 0.103 m)	0.0892225	0.087	Opening
													#90 (-0.009 m; -0.060 m; 0.103 m)	0.0886467	0.11	Opening
													#91 (-0.010 m; -0.060 m; 0.103 m)	0.088934	0.139	Opening
													#92 (-0.011 m; -0.060 m; 0.103 m)	0.0900657	0.168	Opening
													#93 (-0.012 m; -0.060 m; 0.103 m)	0.0913327	0.191	Opening
													#94 (-0.014 m; -0.060 m; 0.103 m)	0.0922113	0.215	Opening
													#95 (6.150e-04 m; -0.060 m; 0.103 m)	0.091604	0.071	Opening
													#96 (0.002 m; -0.060 m; 0.103 m)	0.0912645	0.072	Opening
													#97 (0.003 m; -0.060 m; 0.103 m)	0.0907582	0.075	Opening
													#98 (0.005 m; -0.060 m; 0.103 m)	0.0902476	0.079	Opening
													#99 (0.006 m; -0.060 m; 0.103 m)	0.0895601	0.088	Opening
													#100 (0.007 m; -0.060 m; 0.103 m)	0.0891241	0.104	Opening
													#101 (0.008 m; -0.060 m; 0.103 m)	0.00113485	0.014	Opening
														Total Filtration		1

## Sheet: .1um Speaking
	Injection 04						Injection 05						Injection 06
	.1um Speaking with total of 25 Injection points						.1um Speaking with total of 50 Injection points						.1um Speaking with total of 100 Injection points
	Trajectories	Length [m]	Residence time [s]	Fate			Trajectories	Length [m]	Residence time [s]	Fate			Trajectories	Length [m]	Residence time [s]	Fate
	#1 (-6.946e-04 m; -0.065 m; 0.103 m)	0.0917781	0.03	Opening			#1 (-6.946e-04 m; -0.066 m; 0.103 m)	0.0912916	0.03	Opening			#1 (-6.946e-04 m; -0.066 m; 0.103 m)	0.0912021	0.03	Opening
	#2 (-0.003 m; -0.065 m; 0.103 m)	0.0912828	0.031	Opening			#2 (-0.003 m; -0.066 m; 0.103 m)	0.0908884	0.032	Opening			#2 (-0.002 m; -0.066 m; 0.103 m)	0.0909346	0.031	Opening
	#3 (-0.005 m; -0.065 m; 0.103 m)	0.0932477	0.035	Opening			#3 (-0.005 m; -0.066 m; 0.103 m)	0.0927008	0.036	Opening			#3 (-0.003 m; -0.066 m; 0.103 m)	0.0910015	0.033	Opening
	#4 (-0.007 m; -0.065 m; 0.103 m)	0.0531694	0.024	Absorbed			#4 (-0.007 m; -0.066 m; 0.103 m)	0.0535717	0.024	Absorbed			#4 (-0.005 m; -0.066 m; 0.103 m)	0.0921456	0.035	Opening
	#5 (-0.010 m; -0.065 m; 0.103 m)	0.0505883	0.031	Absorbed			#5 (-0.009 m; -0.066 m; 0.103 m)	0.0504994	0.032	Absorbed			#5 (-0.006 m; -0.066 m; 0.103 m)	0.0939827	0.039	Opening
	#6 (-0.012 m; -0.065 m; 0.103 m)	0.0524055	0.036	Absorbed			#6 (-0.011 m; -0.066 m; 0.103 m)	0.0516193	0.038	Absorbed			#6 (-0.007 m; -0.066 m; 0.103 m)	0.0533182	0.024	Absorbed
	#7 (-0.014 m; -0.065 m; 0.103 m)	0.0535062	0.046	Absorbed			#7 (0.001 m; -0.066 m; 0.103 m)	0.0914254	0.031	Opening			#7 (-0.009 m; -0.066 m; 0.103 m)	0.0504479	0.03	Absorbed
	#8 (0.002 m; -0.065 m; 0.103 m)	0.0918458	0.03	Opening			#8 (0.004 m; -0.066 m; 0.103 m)	0.0919539	0.033	Opening			#8 (-0.010 m; -0.066 m; 0.103 m)	0.0504905	0.034	Absorbed
	#9 (0.004 m; -0.065 m; 0.103 m)	0.0926501	0.033	Opening			#9 (0.006 m; -0.066 m; 0.103 m)	0.0712361	0.033	Absorbed			#9 (6.150e-04 m; -0.066 m; 0.103 m)	0.091311	0.03	Opening
	#10 (0.006 m; -0.065 m; 0.103 m)	0.0682058	0.031	Absorbed			#10 (0.008 m; -0.066 m; 0.103 m)	0.203131	0.272	Absorbed			#10 (0.002 m; -0.066 m; 0.103 m)	0.091314	0.031	Opening
	#11 (0.008 m; -0.065 m; 0.103 m)	0.0637175	0.034	Absorbed			#11 (0.010 m; -0.066 m; 0.103 m)	0.138008	0.216	Absorbed			#11 (0.003 m; -0.066 m; 0.103 m)	0.091622	0.033	Opening
	#12 (0.010 m; -0.065 m; 0.103 m)	0.0640862	0.041	Absorbed			#12 (0.012 m; -0.066 m; 0.103 m)	0.13612	0.212	Absorbed			#12 (0.005 m; -0.066 m; 0.103 m)	0.0927152	0.036	Opening
	#13 (0.013 m; -0.065 m; 0.103 m)	0.060064	0.046	Absorbed			#13 (-6.946e-04 m; -0.064 m; 0.103 m)	0.0923124	0.029	Opening			#13 (0.003 m; -0.066 m; 0.103 m)	0.091622	0.033	Opening
	#14 (4.097e-04 m; -0.061 m; 0.103 m)	0.0599455	0.016	Absorbed			#14 (-0.003 m; -0.064 m; 0.103 m)	0.0916418	0.031	Opening			#14 (0.005 m; -0.066 m; 0.103 m)	0.0927152	0.036	Opening
	#15 (-0.002 m; -0.061 m; 0.103 m)	0.0604036	0.016	Absorbed			#15 (-0.005 m; -0.064 m; 0.103 m)	0.0933257	0.035	Opening			#15 (0.008 m; -0.066 m; 0.103 m)	0.202571	0.273	Absorbed
	#16 (-0.004 m; -0.061 m; 0.103 m)	0.0578255	0.016	Absorbed			#16 (-0.007 m; -0.064 m; 0.103 m)	0.0537577	0.022	Absorbed			#16 (0.010 m; -0.066 m; 0.103 m)	0.208137	0.281	Absorbed
	#17 (-0.006 m; -0.061 m; 0.103 m)	0.0533381	0.019	Absorbed			#17 (-0.009 m; -0.064 m; 0.103 m)	0.0501048	0.029	Absorbed			#17 (0.011 m; -0.066 m; 0.103 m)	0.138252	0.219	Absorbed
	#18 (-0.008 m; -0.061 m; 0.103 m)	0.0495366	0.024	Absorbed			#18 (-0.011 m; -0.064 m; 0.103 m)	0.0518493	0.035	Absorbed			#18 (0.012 m; -0.066 m; 0.103 m)	0.136676	0.217	Absorbed
	#19 (-0.011 m; -0.061 m; 0.103 m)	0.0506008	0.031	Absorbed			#19 (-0.014 m; -0.064 m; 0.103 m)	0.0538146	0.043	Absorbed			#19 (-3.982e-05 m; -0.065 m; 0.103 m)	0.0920364	0.029	Opening
	#20 (-0.013 m; -0.061 m; 0.103 m)	0.0526014	0.038	Absorbed			#20 (0.001 m; -0.064 m; 0.103 m)	0.0922913	0.03	Opening			#20 (-0.001 m; -0.065 m; 0.103 m)	0.0918254	0.03	Opening
	#21 (0.003 m; -0.061 m; 0.103 m)	0.0579233	0.016	Absorbed			#21 (0.004 m; -0.064 m; 0.103 m)	0.093197	0.033	Opening			#21 (-0.003 m; -0.065 m; 0.103 m)	0.0914689	0.031	Opening
	#22 (0.005 m; -0.061 m; 0.103 m)	0.0573472	0.019	Absorbed			#22 (0.006 m; -0.064 m; 0.103 m)	0.0693346	0.03	Absorbed			#22 (-0.004 m; -0.065 m; 0.103 m)	0.0918272	0.033	Opening
	#23 (0.007 m; -0.061 m; 0.103 m)	0.0553169	0.024	Absorbed			#23 (0.008 m; -0.064 m; 0.103 m)	0.056494	0.028	Absorbed			#23 (-0.005 m; -0.065 m; 0.103 m)	0.0935912	0.036	Opening
	#24 (0.009 m; -0.061 m; 0.103 m)	0.0568282	0.029	Absorbed			#24 (0.010 m; -0.064 m; 0.103 m)	0.0582429	0.035	Absorbed			#24 (-0.007 m; -0.065 m; 0.103 m)	0.0549951	0.021	Absorbed
	#25 (0.011 m; -0.061 m; 0.103 m)	0.0580891	0.038	Absorbed			#25 (0.012 m; -0.064 m; 0.103 m)	0.0597996	0.044	Absorbed			#25 (-0.008 m; -0.065 m; 0.103 m)	0.0512474	0.025	Absorbed
		Total Filtration		0.2			#26 (-6.946e-04 m; -0.062 m; 0.103 m)	0.0935049	0.031	Opening			#26 (-0.009 m; -0.065 m; 0.103 m)	0.050427	0.029	Absorbed
							#27 (-0.003 m; -0.062 m; 0.103 m)	0.0928559	0.032	Opening			#27 (-0.011 m; -0.065 m; 0.103 m)	0.0512563	0.032	Absorbed
							#28 (-0.005 m; -0.062 m; 0.103 m)	0.0564894	0.017	Absorbed			#28 (-0.012 m; -0.065 m; 0.103 m)	0.0525107	0.036	Absorbed
							#29 (-0.007 m; -0.062 m; 0.103 m)	0.0520826	0.021	Absorbed			#29 (-0.013 m; -0.065 m; 0.103 m)	0.0535027	0.041	Absorbed
							#30 (-0.009 m; -0.062 m; 0.103 m)	0.0495491	0.028	Absorbed			#30 (-0.014 m; -0.065 m; 0.103 m)	0.0538134	0.048	Absorbed
							#31 (-0.011 m; -0.062 m; 0.103 m)	0.0514258	0.033	Absorbed			#31 (0.001 m; -0.065 m; 0.103 m)	0.0920333	0.03	Opening
							#32 (-0.014 m; -0.062 m; 0.103 m)	0.0536667	0.04	Absorbed			#32 (0.003 m; -0.065 m; 0.103 m)	0.0920733	0.031	Opening
							#33 (0.001 m; -0.062 m; 0.103 m)	0.0933904	0.031	Opening			#33 (0.004 m; -0.065 m; 0.103 m)	0.0930957	0.034	Opening
							#34 (0.004 m; -0.062 m; 0.103 m)	0.0947983	0.035	Opening			#34 (0.005 m; -0.065 m; 0.103 m)	0.0955002	0.038	Opening
							#35 (0.006 m; -0.062 m; 0.103 m)	0.0567974	0.021	Absorbed			#35 (0.007 m; -0.065 m; 0.103 m)	0.0657461	0.03	Absorbed
							#36 (0.008 m; -0.062 m; 0.103 m)	0.0565138	0.026	Absorbed			#36 (0.008 m; -0.065 m; 0.103 m)	0.0629053	0.032	Absorbed
							#37 (0.010 m; -0.062 m; 0.103 m)	0.0581451	0.033	Absorbed			#37 (0.009 m; -0.065 m; 0.103 m)	0.0575767	0.033	Absorbed
							#38 (0.012 m; -0.062 m; 0.103 m)	0.0592468	0.042	Absorbed			#38 (0.010 m; -0.065 m; 0.103 m)	0.0589105	0.038	Absorbed
							#39 (-6.946e-04 m; -0.060 m; 0.103 m)	0.0525776	0.015	Absorbed			#39 (0.012 m; -0.065 m; 0.103 m)	0.0600273	0.043	Absorbed
							#40 (-0.003 m; -0.060 m; 0.103 m)	0.0527963	0.016	Absorbed			#40 (0.013 m; -0.065 m; 0.103 m)	0.0601566	0.048	Absorbed
							#41 (-0.005 m; -0.060 m; 0.103 m)	0.052035	0.016	Absorbed			#41 (-6.946e-04 m; -0.063 m; 0.103 m)	0.092906	0.03	Opening
							#42 (-0.007 m; -0.060 m; 0.103 m)	0.050392	0.02	Absorbed			#42 (-0.002 m; -0.063 m; 0.103 m)	0.0925363	0.03	Opening
							#43 (-0.009 m; -0.060 m; 0.103 m)	0.0499387	0.026	Absorbed			#43 (-0.003 m; -0.063 m; 0.103 m)	0.0920201	0.031	Opening
							#44 (-0.011 m; -0.060 m; 0.103 m)	0.0514718	0.033	Absorbed			#44 (-0.005 m; -0.063 m; 0.103 m)	0.0928527	0.034	Opening
							#45 (-0.014 m; -0.060 m; 0.103 m)	0.0529112	0.04	Absorbed			#45 (-0.006 m; -0.063 m; 0.103 m)	0.0561268	0.019	Absorbed
							#46 (0.001 m; -0.060 m; 0.103 m)	0.052335	0.015	Absorbed			#46 (-0.007 m; -0.063 m; 0.103 m)	0.0529742	0.022	Absorbed
							#47 (0.004 m; -0.060 m; 0.103 m)	0.0534332	0.016	Absorbed			#47 (-0.009 m; -0.063 m; 0.103 m)	0.0499508	0.026	Absorbed
							#48 (0.006 m; -0.060 m; 0.103 m)	0.0551998	0.02	Absorbed			#48 (-0.010 m; -0.063 m; 0.103 m)	0.0501173	0.03	Absorbed
							#49 (0.008 m; -0.060 m; 0.103 m)	0.0547475	0.024	Absorbed			#49 (-0.011 m; -0.063 m; 0.103 m)	0.0513682	0.033	Absorbed
							#50 (0.010 m; -0.060 m; 0.103 m)	0.0555837	0.032	Absorbed			#50 (-0.012 m; -0.063 m; 0.103 m)	0.0527164	0.037	Absorbed
								Total Filtration		0.28			#51 (-0.014 m; -0.063 m; 0.103 m)	0.053882	0.042	Absorbed
													#52 (6.150e-04 m; -0.063 m; 0.103 m)	0.0929062	0.03	Opening
													#53 (0.002 m; -0.063 m; 0.103 m)	0.0926478	0.031	Opening
													#54 (0.003 m; -0.063 m; 0.103 m)	0.0933509	0.033	Opening
													#55 (0.005 m; -0.063 m; 0.103 m)	0.0957645	0.036	Opening
													#56 (0.006 m; -0.063 m; 0.103 m)	0.0676791	0.028	Absorbed
													#57 (0.007 m; -0.063 m; 0.103 m)	0.0561012	0.025	Absorbed
													#58 (0.008 m; -0.063 m; 0.103 m)	0.0561498	0.029	Absorbed
													#59 (0.010 m; -0.063 m; 0.103 m)	0.0583409	0.033	Absorbed
													#60 (0.011 m; -0.063 m; 0.103 m)	0.0595359	0.038	Absorbed
													#61 (0.012 m; -0.063 m; 0.103 m)	0.0594846	0.044	Absorbed
													#62 (-3.982e-05 m; -0.062 m; 0.103 m)	0.0938768	0.032	Opening
													#63 (-0.001 m; -0.062 m; 0.103 m)	0.0938979	0.032	Opening
													#64 (-0.003 m; -0.062 m; 0.103 m)	0.0933528	0.032	Opening
													#65 (-0.004 m; -0.062 m; 0.103 m)	0.0583299	0.016	Absorbed
													#66 (-0.005 m; -0.062 m; 0.103 m)	0.0557484	0.017	Absorbed
													#67 (-0.007 m; -0.062 m; 0.103 m)	0.0533928	0.02	Absorbed
													#68 (-0.008 m; -0.062 m; 0.103 m)	0.0499988	0.023	Absorbed
													#69 (-0.009 m; -0.062 m; 0.103 m)	0.0494716	0.027	Absorbed
													#70 (-0.011 m; -0.062 m; 0.103 m)	0.0504603	0.03	Absorbed
													#71 (-0.012 m; -0.062 m; 0.103 m)	0.0517674	0.034	Absorbed
													#72 (-0.013 m; -0.062 m; 0.103 m)	0.0529561	0.039	Absorbed
													#73 (-0.014 m; -0.062 m; 0.103 m)	0.0541996	0.044	Absorbed
													#74 (0.001 m; -0.062 m; 0.103 m)	0.0938147	0.032	Opening
													#75 (0.003 m; -0.062 m; 0.103 m)	0.0583124	0.016	Absorbed
													#76 (0.004 m; -0.062 m; 0.103 m)	0.0573631	0.017	Absorbed
													#77 (0.005 m; -0.062 m; 0.103 m)	0.0572359	0.02	Absorbed
													#78 (0.007 m; -0.062 m; 0.103 m)	0.0560255	0.023	Absorbed
													#79 (0.008 m; -0.062 m; 0.103 m)	0.0560328	0.026	Absorbed
													#80 (0.009 m; -0.062 m; 0.103 m)	0.0571288	0.029	Absorbed
													#81 (0.010 m; -0.062 m; 0.103 m)	0.0581571	0.034	Absorbed
													#82 (0.012 m; -0.062 m; 0.103 m)	0.0583989	0.04	Absorbed
													#83 (0.013 m; -0.062 m; 0.103 m)	0.0582511	0.044	Absorbed
													#84 (-6.946e-04 m; -0.060 m; 0.103 m)	0.0518983	0.016	Absorbed
													#85 (-0.002 m; -0.060 m; 0.103 m)	0.0521364	0.016	Absorbed
													#86 (-0.003 m; -0.060 m; 0.103 m)	0.0518035	0.016	Absorbed
													#87 (-0.005 m; -0.060 m; 0.103 m)	0.0515883	0.016	Absorbed
													#88 (-0.006 m; -0.060 m; 0.103 m)	0.0513164	0.017	Absorbed
													#89 (-0.007 m; -0.060 m; 0.103 m)	0.0501734	0.02	Absorbed
													#90 (-0.009 m; -0.060 m; 0.103 m)	0.0497606	0.024	Absorbed
													#91 (-0.010 m; -0.060 m; 0.103 m)	0.0506282	0.028	Absorbed
													#92 (-0.011 m; -0.060 m; 0.103 m)	0.0513102	0.032	Absorbed
													#93 (-0.012 m; -0.060 m; 0.103 m)	0.0521169	0.036	Absorbed
													#94 (-0.014 m; -0.060 m; 0.103 m)	0.0529632	0.04	Absorbed
													#95 (6.150e-04 m; -0.060 m; 0.103 m)	0.0516527	0.015	Absorbed
													#96 (0.002 m; -0.060 m; 0.103 m)	0.0517142	0.015	Absorbed
													#97 (0.003 m; -0.060 m; 0.103 m)	0.0524473	0.016	Absorbed
													#98 (0.005 m; -0.060 m; 0.103 m)	0.053675	0.017	Absorbed
													#99 (0.006 m; -0.060 m; 0.103 m)	0.0545442	0.02	Absorbed
													#100 (0.007 m; -0.060 m; 0.103 m)	0.0543247	0.022	Absorbed
													#101 (0.008 m; -0.060 m; 0.103 m)	0.0547735	0.025	Absorbed
														Total Filtration		0.32

## Sheet: .1um Coughing
	Injection 07						Injection 08						Injection 09
	.1um Coughing with total of 25 Injection points						.1um Coughing with total of 50 Injection points						.1um Coughing with total of 100 Injection points
	Trajectories	Length [m]	Residence time [s]	Fate			Trajectories	Length [m]	Residence time [s]	Fate			Trajectories	Length [m]	Residence time [s]	Fate
	#1 (-6.946e-04 m; -0.065 m; 0.103 m)	0.387306	0.24	Interpolation failed			#1 (-6.946e-04 m; -0.066 m; 0.103 m)	0.378241	0.233	Interpolation failed			#1 (-6.946e-04 m; -0.066 m; 0.103 m)	0.376604	0.231	Interpolation failed
	#2 (-0.003 m; -0.065 m; 0.103 m)	0.376167	0.202	Interpolation failed			#2 (-0.003 m; -0.066 m; 0.103 m)	0.369626	0.205	Interpolation failed			#2 (-0.002 m; -0.066 m; 0.103 m)	0.371719	0.212	Interpolation failed
	#3 (-0.005 m; -0.065 m; 0.103 m)	0.352607	0.232	Interpolation failed			#3 (-0.005 m; -0.066 m; 0.103 m)	0.350877	0.24	Interpolation failed			#3 (-0.003 m; -0.066 m; 0.103 m)	0.365803	0.205	Interpolation failed
	#4 (-0.007 m; -0.065 m; 0.103 m)	0.164189	0.051	Absorbed			#4 (-0.007 m; -0.066 m; 0.103 m)	0.163604	0.048	Absorbed			#4 (-0.005 m; -0.066 m; 0.103 m)	0.352945	0.223	Interpolation failed
	#5 (-0.010 m; -0.065 m; 0.103 m)	0.0511245	0.007	Absorbed			#5 (-0.009 m; -0.066 m; 0.103 m)	0.0516192	0.008	Absorbed			#5 (-0.006 m; -0.066 m; 0.103 m)	0.347206	0.332	Interpolation failed
	#6 (-0.012 m; -0.065 m; 0.103 m)	0.00152882	0.0004875	Opening			#6 (-0.011 m; -0.066 m; 0.103 m)	0.00304447	0.0009762	Opening			#6 (-0.007 m; -0.066 m; 0.103 m)	0.40229	0.14	Absorbed
	#7 (-0.014 m; -0.065 m; 0.103 m)	0.00314752	0.001	Opening			#7 (0.001 m; -0.066 m; 0.103 m)	0.131412	0.02	Absorbed			#7 (-0.009 m; -0.066 m; 0.103 m)	0.053232	0.008	Absorbed
	#8 (0.002 m; -0.065 m; 0.103 m)	0.13027	0.018	Absorbed			#8 (0.004 m; -0.066 m; 0.103 m)	0.362379	0.197	Interpolation failed			#8 (-0.010 m; -0.066 m; 0.103 m)	0.0516792	0.007	Absorbed
	#9 (0.004 m; -0.065 m; 0.103 m)	0.364939	0.198	Interpolation failed			#9 (0.006 m; -0.066 m; 0.103 m)	0.0521667	0.007	Absorbed			#9 (6.150e-04 m; -0.066 m; 0.103 m)	0.127825	0.019	Absorbed
	#10 (0.006 m; -0.065 m; 0.103 m)	0.0510416	0.006	Absorbed			#10 (0.008 m; -0.066 m; 0.103 m)	0.0500969	0.007	Absorbed			#10 (0.002 m; -0.066 m; 0.103 m)	0.156014	0.027	Absorbed
	#11 (0.008 m; -0.065 m; 0.103 m)	0.0497306	0.006	Absorbed			#11 (0.010 m; -0.066 m; 0.103 m)	0.054294	0.007	Absorbed			#11 (0.003 m; -0.066 m; 0.103 m)	0.361732	0.199	Interpolation failed
	#12 (0.010 m; -0.065 m; 0.103 m)	0.054109	0.007	Absorbed			#12 (0.012 m; -0.066 m; 0.103 m)	0.0581122	0.011	Absorbed			#12 (0.005 m; -0.066 m; 0.103 m)	0.064624	0.007	Absorbed
	#13 (0.013 m; -0.065 m; 0.103 m)	0.0110764	0.004	Absorbed			#13 (-6.946e-04 m; -0.064 m; 0.103 m)	0.0763083	0.008	Absorbed			#13 (0.006 m; -0.066 m; 0.103 m)	0.0518203	0.007	Absorbed
	#14 (4.097e-04 m; -0.061 m; 0.103 m)	0.0544921	0.004	Absorbed			#14 (-0.003 m; -0.064 m; 0.103 m)	0.0734214	0.008	Absorbed			#14 (0.007 m; -0.066 m; 0.103 m)	0.0408022	0.005	Absorbed
	#15 (-0.002 m; -0.061 m; 0.103 m)	0.0555869	0.004	Absorbed			#15 (-0.005 m; -0.064 m; 0.103 m)	0.356478	0.218	Interpolation failed			#15 (0.008 m; -0.066 m; 0.103 m)	0.0471528	0.006	Absorbed
	#16 (-0.004 m; -0.061 m; 0.103 m)	0.0537013	0.004	Absorbed			#16 (-0.007 m; -0.064 m; 0.103 m)	0.0568056	0.006	Absorbed			#16 (0.010 m; -0.066 m; 0.103 m)	0.0538291	0.007	Absorbed
	#17 (-0.006 m; -0.061 m; 0.103 m)	0.0509734	0.005	Absorbed			#17 (-0.009 m; -0.064 m; 0.103 m)	0.0499978	0.007	Absorbed			#17 (0.011 m; -0.066 m; 0.103 m)	0.00300175	0.0008701	Opening
	#18 (-0.008 m; -0.061 m; 0.103 m)	0.048425	0.005	Absorbed			#18 (-0.011 m; -0.064 m; 0.103 m)	0.000951957	0.0002597	Opening			#18 (0.012 m; -0.066 m; 0.103 m)	0.545826	0.379	Absorbed
	#19 (-0.011 m; -0.061 m; 0.103 m)	0.0509986	0.006	Absorbed			#19 (-0.014 m; -0.064 m; 0.103 m)	0.00161671	0.000544	Opening			#19 (-3.982e-05 m; -0.065 m; 0.103 m)	0.133603	0.02	Absorbed
	#20 (-0.013 m; -0.061 m; 0.103 m)	0.00535295	0.002	Absorbed			#20 (0.001 m; -0.064 m; 0.103 m)	0.130753	0.019	Absorbed			#20 (-0.001 m; -0.065 m; 0.103 m)	0.0728528	0.007	Absorbed
	#21 (0.003 m; -0.061 m; 0.103 m)	0.0525752	0.004	Absorbed			#21 (0.004 m; -0.064 m; 0.103 m)	0.368184	0.199	Interpolation failed			#21 (-0.003 m; -0.065 m; 0.103 m)	0.072118	0.007	Absorbed
	#22 (0.005 m; -0.061 m; 0.103 m)	0.0496488	0.005	Absorbed			#22 (0.006 m; -0.064 m; 0.103 m)	0.0508423	0.006	Absorbed			#22 (-0.004 m; -0.065 m; 0.103 m)	0.366307	0.202	Interpolation failed
	#23 (0.007 m; -0.061 m; 0.103 m)	0.0484414	0.005	Absorbed			#23 (0.008 m; -0.064 m; 0.103 m)	0.0491054	0.006	Absorbed			#23 (-0.005 m; -0.065 m; 0.103 m)	0.352436	0.237	Interpolation failed
	#24 (0.009 m; -0.061 m; 0.103 m)	0.050864	0.006	Absorbed			#24 (0.010 m; -0.064 m; 0.103 m)	0.0529066	0.007	Absorbed			#24 (-0.007 m; -0.065 m; 0.103 m)	0.211888	0.161	Absorbed
	#25 (0.011 m; -0.061 m; 0.103 m)	0.0066228	0.002	Absorbed			#25 (0.012 m; -0.064 m; 0.103 m)	0.00947325	0.003	Absorbed			#25 (-0.008 m; -0.065 m; 0.103 m)	0.0542978	0.007	Absorbed
		Total Filtration		0.08			#26 (-6.946e-04 m; -0.062 m; 0.103 m)	0.100852	0.015	Opening			#26 (-0.009 m; -0.065 m; 0.103 m)	0.0510356	0.007	Absorbed
		Potentially Escaped		0.16			#27 (-0.003 m; -0.062 m; 0.103 m)	0.099165	0.015	Opening			#27 (-0.011 m; -0.065 m; 0.103 m)	0.0511358	0.006	Absorbed
							#28 (-0.005 m; -0.062 m; 0.103 m)	0.0574321	0.005	Absorbed			#28 (-0.012 m; -0.065 m; 0.103 m)	0.0012339	0.0003783	Opening
							#29 (-0.007 m; -0.062 m; 0.103 m)	0.0509933	0.005	Absorbed			#29 (-0.013 m; -0.065 m; 0.103 m)	0.00147447	0.0005109	Opening
							#30 (-0.009 m; -0.062 m; 0.103 m)	0.0488301	0.006	Absorbed			#30 (-0.014 m; -0.065 m; 0.103 m)	0.0115056	0.004	Absorbed
							#31 (-0.011 m; -0.062 m; 0.103 m)	0.00104128	0.0002731	Opening			#31 (0.001 m; -0.065 m; 0.103 m)	0.12817	0.017	Absorbed
							#32 (-0.014 m; -0.062 m; 0.103 m)	0.00690417	0.003	Absorbed			#32 (0.003 m; -0.065 m; 0.103 m)	0.368118	0.204	Interpolation failed
							#33 (0.001 m; -0.062 m; 0.103 m)	0.101577	0.016	Opening			#33 (0.004 m; -0.065 m; 0.103 m)	0.365225	0.198	Interpolation failed
							#34 (0.004 m; -0.062 m; 0.103 m)	0.0563906	0.005	Absorbed			#34 (0.005 m; -0.065 m; 0.103 m)	0.0540733	0.006	Absorbed
							#35 (0.006 m; -0.062 m; 0.103 m)	0.0489429	0.005	Absorbed			#35 (0.007 m; -0.065 m; 0.103 m)	0.0496975	0.006	Absorbed
							#36 (0.008 m; -0.062 m; 0.103 m)	0.0491988	0.006	Absorbed			#36 (0.008 m; -0.065 m; 0.103 m)	0.0492479	0.006	Absorbed
							#37 (0.010 m; -0.062 m; 0.103 m)	0.0523534	0.007	Absorbed			#37 (0.009 m; -0.065 m; 0.103 m)	0.0512206	0.006	Absorbed
							#38 (0.012 m; -0.062 m; 0.103 m)	0.00801332	0.003	Absorbed			#38 (0.010 m; -0.065 m; 0.103 m)	0.0540333	0.007	Absorbed
							#39 (-6.946e-04 m; -0.060 m; 0.103 m)	0.0509105	0.004	Absorbed			#39 (0.012 m; -0.065 m; 0.103 m)	0.00340731	0.001	Opening
							#40 (-0.003 m; -0.060 m; 0.103 m)	0.0502646	0.004	Absorbed			#40 (0.013 m; -0.065 m; 0.103 m)	0.433873	0.387	Absorbed
							#41 (-0.005 m; -0.060 m; 0.103 m)	0.0496223	0.004	Absorbed			#41 (-6.946e-04 m; -0.063 m; 0.103 m)	0.100809	0.015	Opening
							#42 (-0.007 m; -0.060 m; 0.103 m)	0.048532	0.005	Absorbed			#42 (-0.002 m; -0.063 m; 0.103 m)	0.0832292	0.01	Absorbed
							#43 (-0.009 m; -0.060 m; 0.103 m)	0.0492617	0.006	Absorbed			#43 (-0.003 m; -0.063 m; 0.103 m)	0.0757364	0.008	Absorbed
							#44 (-0.011 m; -0.060 m; 0.103 m)	0.0491794	0.007	Absorbed			#44 (-0.005 m; -0.063 m; 0.103 m)	0.36485	0.204	Interpolation failed
							#45 (-0.014 m; -0.060 m; 0.103 m)	0.00662373	0.002	Absorbed			#45 (-0.006 m; -0.063 m; 0.103 m)	0.0584027	0.005	Absorbed
							#46 (0.001 m; -0.060 m; 0.103 m)	0.050485	0.004	Absorbed			#46 (-0.007 m; -0.063 m; 0.103 m)	0.0530139	0.006	Absorbed
							#47 (0.004 m; -0.060 m; 0.103 m)	0.0498549	0.004	Absorbed			#47 (-0.009 m; -0.063 m; 0.103 m)	0.0497415	0.006	Absorbed
							#48 (0.006 m; -0.060 m; 0.103 m)	0.048618	0.005	Absorbed			#48 (-0.010 m; -0.063 m; 0.103 m)	0.0496421	0.006	Absorbed
							#49 (0.008 m; -0.060 m; 0.103 m)	0.0494238	0.006	Absorbed			#49 (-0.011 m; -0.063 m; 0.103 m)	0.000913999	0.0002206	Opening
							#50 (0.010 m; -0.060 m; 0.103 m)	0.0518624	0.007	Absorbed			#50 (-0.012 m; -0.063 m; 0.103 m)	0.00095428	0.0002591	Opening
								Total Filtration		0.14			#51 (-0.014 m; -0.063 m; 0.103 m)	0.00777693	0.003	Absorbed
								Potentially Escaped		0.12			#52 (6.150e-04 m; -0.063 m; 0.103 m)	0.101274	0.015	Opening
													#53 (0.002 m; -0.063 m; 0.103 m)	0.10184	0.016	Opening
													#54 (0.003 m; -0.063 m; 0.103 m)	0.373883	0.203	Interpolation failed
													#55 (0.005 m; -0.063 m; 0.103 m)	0.0555278	0.005	Absorbed
													#56 (0.006 m; -0.063 m; 0.103 m)	0.0496105	0.005	Absorbed
													#57 (0.007 m; -0.063 m; 0.103 m)	0.048551	0.006	Absorbed
													#58 (0.008 m; -0.063 m; 0.103 m)	0.0498321	0.006	Absorbed
													#59 (0.010 m; -0.063 m; 0.103 m)	0.0520395	0.006	Absorbed
													#60 (0.011 m; -0.063 m; 0.103 m)	0.00162127	0.0004458	Opening
													#61 (0.012 m; -0.063 m; 0.103 m)	0.00892877	0.003	Absorbed
													#62 (-3.982e-05 m; -0.062 m; 0.103 m)	0.0603013	0.004	Absorbed
													#63 (-0.001 m; -0.062 m; 0.103 m)	0.100833	0.015	Opening
													#64 (-0.003 m; -0.062 m; 0.103 m)	0.0996702	0.015	Opening
													#65 (-0.004 m; -0.062 m; 0.103 m)	0.0564713	0.004	Absorbed
													#66 (-0.005 m; -0.062 m; 0.103 m)	0.0545145	0.004	Absorbed
													#67 (-0.007 m; -0.062 m; 0.103 m)	0.0511992	0.005	Absorbed
													#68 (-0.008 m; -0.062 m; 0.103 m)	0.0489437	0.005	Absorbed
													#69 (-0.009 m; -0.062 m; 0.103 m)	0.0486857	0.005	Absorbed
													#70 (-0.011 m; -0.062 m; 0.103 m)	0.050803	0.006	Absorbed
													#71 (-0.012 m; -0.062 m; 0.103 m)	0.0531476	0.007	Absorbed
													#72 (-0.013 m; -0.062 m; 0.103 m)	0.00587755	0.002	Absorbed
													#73 (-0.014 m; -0.062 m; 0.103 m)	0.00950005	0.003	Absorbed
													#74 (0.001 m; -0.062 m; 0.103 m)	0.0562014	0.004	Absorbed
													#75 (0.003 m; -0.062 m; 0.103 m)	0.0543005	0.004	Absorbed
													#76 (0.004 m; -0.062 m; 0.103 m)	0.0531741	0.004	Absorbed
													#77 (0.005 m; -0.062 m; 0.103 m)	0.0494583	0.005	Absorbed
													#78 (0.007 m; -0.062 m; 0.103 m)	0.0483719	0.005	Absorbed
													#79 (0.008 m; -0.062 m; 0.103 m)	0.0491644	0.006	Absorbed
													#80 (0.009 m; -0.062 m; 0.103 m)	0.0507291	0.006	Absorbed
													#81 (0.010 m; -0.062 m; 0.103 m)	0.0524347	0.007	Absorbed
													#82 (0.012 m; -0.062 m; 0.103 m)	0.0070945	0.002	Absorbed
													#83 (0.013 m; -0.062 m; 0.103 m)	0.325942	0.584	Interpolation failed
													#84 (-6.946e-04 m; -0.060 m; 0.103 m)	0.0502443	0.004	Absorbed
													#85 (-0.002 m; -0.060 m; 0.103 m)	0.0497894	0.004	Absorbed
													#86 (-0.003 m; -0.060 m; 0.103 m)	0.0496206	0.004	Absorbed
													#87 (-0.005 m; -0.060 m; 0.103 m)	0.0494481	0.004	Absorbed
													#88 (-0.006 m; -0.060 m; 0.103 m)	0.0489527	0.005	Absorbed
													#89 (-0.007 m; -0.060 m; 0.103 m)	0.0484303	0.005	Absorbed
													#90 (-0.009 m; -0.060 m; 0.103 m)	0.0484906	0.005	Absorbed
													#91 (-0.010 m; -0.060 m; 0.103 m)	0.0500784	0.006	Absorbed
													#92 (-0.011 m; -0.060 m; 0.103 m)	0.0483319	0.007	Absorbed
													#93 (-0.012 m; -0.060 m; 0.103 m)	0.0043554	0.002	Absorbed
													#94 (-0.014 m; -0.060 m; 0.103 m)	0.00730406	0.003	Absorbed
													#95 (6.150e-04 m; -0.060 m; 0.103 m)	0.0501739	0.004	Absorbed
													#96 (0.002 m; -0.060 m; 0.103 m)	0.0499497	0.004	Absorbed
													#97 (0.003 m; -0.060 m; 0.103 m)	0.0496354	0.005	Absorbed
													#98 (0.005 m; -0.060 m; 0.103 m)	0.0492777	0.005	Absorbed
													#99 (0.006 m; -0.060 m; 0.103 m)	0.0485468	0.005	Absorbed
													#100 (0.007 m; -0.060 m; 0.103 m)	0.0487834	0.005	Absorbed
													#101 (0.008 m; -0.060 m; 0.103 m)	0.0500537	0.006	Absorbed
														Total Filtration		0.12
														Potentially Escaped		0.13

## Sheet: .5um  Mouth Breathing
	Injection 1						Injection 2						Injection 3
	.5um Mouth Breathing with total of 25 Injection points						.5um Mouth Breathing with total of 50 Injection points						.5um Mouth Breathing with total of 100 Injection points
	Initial Injection Location	Total Distance [m]	Residence Time [s]	Result (Particle Fate)			Initial Injection Location	Total Distance [m]	Residence Time [s]	Result (Particle Fate)			Initial Injection Location	Total Distance [m]	Residence time [s]	Result (Particle Fate)
	#1 (-6.946e-04 m; -0.065 m; 0.103 m)	0.0880561	0.058	Opening			#1 (-6.946e-04 m; -0.066 m; 0.103 m)	0.0876055	0.06	Opening			#1 (-6.946e-04 m; -0.066 m; 0.103 m)	0.087517	0.06	Opening
	#2 (-0.003 m; -0.065 m; 0.103 m)	0.0877075	0.062	Opening			#2 (-0.003 m; -0.066 m; 0.103 m)	0.0872901	0.063	Opening			#2 (-0.002 m; -0.066 m; 0.103 m)	0.0873215	0.062	Opening
	#3 (-0.005 m; -0.065 m; 0.103 m)	0.0872908	0.07	Opening			#3 (-0.005 m; -0.066 m; 0.103 m)	0.0869231	0.072	Opening			#3 (-0.003 m; -0.066 m; 0.103 m)	0.087142	0.065	Opening
	#4 (-0.007 m; -0.065 m; 0.103 m)	0.0868385	0.088	Opening			#4 (-0.007 m; -0.066 m; 0.103 m)	0.0865433	0.09	Opening			#4 (-0.005 m; -0.066 m; 0.103 m)	0.0869125	0.07	Opening
	#5 (-0.010 m; -0.065 m; 0.103 m)	0.087515	0.132	Opening			#5 (-0.009 m; -0.066 m; 0.103 m)	0.0869907	0.134	Opening			#5 (-0.006 m; -0.066 m; 0.103 m)	0.0866868	0.079	Opening
	#6 (-0.012 m; -0.065 m; 0.103 m)	0.0887902	0.206	Opening			#6 (-0.011 m; -0.066 m; 0.103 m)	0.0880856	0.2	Opening			#6 (-0.007 m; -0.066 m; 0.103 m)	0.0864707	0.093	Opening
	#7 (-0.014 m; -0.065 m; 0.103 m)	0.0904401	0.281	Opening			#7 (0.001 m; -0.066 m; 0.103 m)	0.0875623	0.063	Opening			#7 (-0.009 m; -0.066 m; 0.103 m)	0.0865003	0.118	Opening
	#8 (0.002 m; -0.065 m; 0.103 m)	0.088004	0.062	Opening			#8 (0.004 m; -0.066 m; 0.103 m)	0.0872142	0.07	Opening			#8 (-0.010 m; -0.066 m; 0.103 m)	0.087041	0.151	Opening
	#9 (0.004 m; -0.065 m; 0.103 m)	0.08758	0.069	Opening			#9 (0.006 m; -0.066 m; 0.103 m)	0.0866146	0.088	Opening			#9 (6.150e-04 m; -0.066 m; 0.103 m)	0.087581	0.061	Opening
	#10 (0.006 m; -0.065 m; 0.103 m)	0.0868766	0.087	Opening			#10 (0.008 m; -0.066 m; 0.103 m)	0.0874521	0.124	Opening			#10 (0.002 m; -0.066 m; 0.103 m)	0.0874215	0.065	Opening
	#11 (0.008 m; -0.065 m; 0.103 m)	0.0873796	0.125	Opening			#11 (0.010 m; -0.066 m; 0.103 m)	0.090701	0.173	Opening			#11 (0.003 m; -0.066 m; 0.103 m)	0.0872202	0.069	Opening
	#12 (0.010 m; -0.065 m; 0.103 m)	0.0912698	0.178	Opening			#12 (0.012 m; -0.066 m; 0.103 m)	0.0947239	0.289	Opening			#12 (0.005 m; -0.066 m; 0.103 m)	0.0868959	0.077	Opening
	#13 (0.013 m; -0.065 m; 0.103 m)	0.0955654	0.301	Opening			#13 (-6.946e-04 m; -0.064 m; 0.103 m)	0.088536	0.058	Opening			#13 (0.006 m; -0.066 m; 0.103 m)	0.0865351	0.09	Opening
	#14 (4.097e-04 m; -0.061 m; 0.103 m)	0.0905234	0.064	Opening			#14 (-0.003 m; -0.064 m; 0.103 m)	0.0881882	0.061	Opening			#14 (0.007 m; -0.066 m; 0.103 m)	0.0866067	0.111	Opening
	#15 (-0.002 m; -0.061 m; 0.103 m)	0.090216	0.064	Opening			#15 (-0.005 m; -0.064 m; 0.103 m)	0.0877412	0.068	Opening			#15 (0.008 m; -0.066 m; 0.103 m)	0.0881448	0.136	Opening
	#16 (-0.004 m; -0.061 m; 0.103 m)	0.0896442	0.067	Opening			#16 (-0.007 m; -0.064 m; 0.103 m)	0.0872351	0.083	Opening			#16 (0.010 m; -0.066 m; 0.103 m)	0.0902637	0.166	Opening
	#17 (-0.006 m; -0.061 m; 0.103 m)	0.0888762	0.075	Opening			#17 (-0.009 m; -0.064 m; 0.103 m)	0.0874767	0.121	Opening			#17 (0.011 m; -0.066 m; 0.103 m)	0.0925056	0.215	Opening
	#18 (-0.008 m; -0.061 m; 0.103 m)	0.0880472	0.1	Opening			#18 (-0.011 m; -0.064 m; 0.103 m)	0.0895608	0.187	Opening			#18 (0.012 m; -0.066 m; 0.103 m)	0.0943604	0.309	Opening
	#19 (-0.011 m; -0.061 m; 0.103 m)	0.089202	0.151	Opening			#19 (-0.014 m; -0.064 m; 0.103 m)	0.0904156	0.261	Opening			#19 (-3.982e-05 m; -0.065 m; 0.103 m)	0.0883643	0.058	Opening
	#20 (-0.013 m; -0.061 m; 0.103 m)	0.0916955	0.204	Opening			#20 (0.001 m; -0.064 m; 0.103 m)	0.088483	0.061	Opening			#20 (-0.001 m; -0.065 m; 0.103 m)	0.088133	0.059	Opening
	#21 (0.003 m; -0.061 m; 0.103 m)	0.0899642	0.068	Opening			#21 (0.004 m; -0.064 m; 0.103 m)	0.0880643	0.068	Opening			#21 (-0.003 m; -0.065 m; 0.103 m)	0.087931	0.061	Opening
	#22 (0.005 m; -0.061 m; 0.103 m)	0.0891914	0.077	Opening			#22 (0.006 m; -0.064 m; 0.103 m)	0.087294	0.082	Opening			#22 (-0.004 m; -0.065 m; 0.103 m)	0.0876932	0.064	Opening
	#23 (0.007 m; -0.061 m; 0.103 m)	0.0881449	0.1	Opening			#23 (0.008 m; -0.064 m; 0.103 m)	0.0872412	0.115	Opening			#23 (-0.005 m; -0.065 m; 0.103 m)	0.0874236	0.07	Opening
	#24 (0.009 m; -0.061 m; 0.103 m)	0.0901041	0.138	Opening			#24 (0.010 m; -0.064 m; 0.103 m)	0.0907653	0.166	Opening			#24 (-0.007 m; -0.065 m; 0.103 m)	0.0871473	0.079	Opening
	#25 (0.011 m; -0.061 m; 0.103 m)	0.0942588	0.209	Opening			#25 (0.012 m; -0.064 m; 0.103 m)	0.0953515	0.255	Opening			#25 (-0.008 m; -0.065 m; 0.103 m)	0.0868478	0.096	Opening
		Total Filtration		1			#26 (-6.946e-04 m; -0.062 m; 0.103 m)	0.0897321	0.061	Opening			#26 (-0.009 m; -0.065 m; 0.103 m)	0.0873079	0.122	Opening
							#27 (-0.003 m; -0.062 m; 0.103 m)	0.0892809	0.063	Opening			#27 (-0.011 m; -0.065 m; 0.103 m)	0.0885542	0.158	Opening
							#28 (-0.005 m; -0.062 m; 0.103 m)	0.088725	0.068	Opening			#28 (-0.012 m; -0.065 m; 0.103 m)	0.0891103	0.206	Opening
							#29 (-0.007 m; -0.062 m; 0.103 m)	0.0880589	0.082	Opening			#29 (-0.013 m; -0.065 m; 0.103 m)	0.0898315	0.251	Opening
							#30 (-0.009 m; -0.062 m; 0.103 m)	0.0875818	0.117	Opening			#30 (-0.014 m; -0.065 m; 0.103 m)	0.091077	0.291	Opening
							#31 (-0.011 m; -0.062 m; 0.103 m)	0.0903256	0.169	Opening			#31 (0.001 m; -0.065 m; 0.103 m)	0.0882084	0.061	Opening
							#32 (-0.014 m; -0.062 m; 0.103 m)	0.0915267	0.237	Opening			#32 (0.003 m; -0.065 m; 0.103 m)	0.087998	0.065	Opening
							#33 (0.001 m; -0.062 m; 0.103 m)	0.0895924	0.063	Opening			#33 (0.004 m; -0.065 m; 0.103 m)	0.0876956	0.07	Opening
							#34 (0.004 m; -0.062 m; 0.103 m)	0.0891001	0.069	Opening			#34 (0.005 m; -0.065 m; 0.103 m)	0.0872626	0.078	Opening
							#35 (0.006 m; -0.062 m; 0.103 m)	0.0881417	0.082	Opening			#35 (0.007 m; -0.065 m; 0.103 m)	0.0868435	0.093	Opening
							#36 (0.008 m; -0.062 m; 0.103 m)	0.0880232	0.112	Opening			#36 (0.008 m; -0.065 m; 0.103 m)	0.0870214	0.116	Opening
							#37 (0.010 m; -0.062 m; 0.103 m)	0.00208588	0.019	Opening			#37 (0.009 m; -0.065 m; 0.103 m)	0.0891937	0.145	Opening
							#38 (0.012 m; -0.062 m; 0.103 m)	0.0955269	0.243	Opening			#38 (0.010 m; -0.065 m; 0.103 m)	0.0914237	0.18	Opening
							#39 (-6.946e-04 m; -0.060 m; 0.103 m)	0.0913679	0.069	Opening			#39 (0.012 m; -0.065 m; 0.103 m)	0.0939517	0.234	Opening
							#40 (-0.003 m; -0.060 m; 0.103 m)	0.0908447	0.069	Opening			#40 (0.013 m; -0.065 m; 0.103 m)	0.0955732	0.343	Opening
							#41 (-0.005 m; -0.060 m; 0.103 m)	0.0900822	0.072	Opening			#41 (-6.946e-04 m; -0.063 m; 0.103 m)	0.0891078	0.059	Opening
							#42 (-0.007 m; -0.060 m; 0.103 m)	0.0891208	0.085	Opening			#42 (-0.002 m; -0.063 m; 0.103 m)	0.0888572	0.06	Opening
							#43 (-0.009 m; -0.060 m; 0.103 m)	0.0884905	0.123	Opening			#43 (-0.003 m; -0.063 m; 0.103 m)	0.08863	0.062	Opening
							#44 (-0.011 m; -0.060 m; 0.103 m)	0.0902985	0.172	Opening			#44 (-0.005 m; -0.063 m; 0.103 m)	0.0883072	0.066	Opening
							#45 (-0.014 m; -0.060 m; 0.103 m)	0.0920945	0.213	Opening			#45 (-0.006 m; -0.063 m; 0.103 m)	0.0879737	0.072	Opening
							#46 (0.001 m; -0.060 m; 0.103 m)	0.0911688	0.07	Opening			#46 (-0.007 m; -0.063 m; 0.103 m)	0.0876026	0.083	Opening
							#47 (0.004 m; -0.060 m; 0.103 m)	0.0904615	0.075	Opening			#47 (-0.009 m; -0.063 m; 0.103 m)	0.087226	0.103	Opening
							#48 (0.006 m; -0.060 m; 0.103 m)	0.0894506	0.086	Opening			#48 (-0.010 m; -0.063 m; 0.103 m)	0.0879879	0.131	Opening
							#49 (0.008 m; -0.060 m; 0.103 m)	0.0895941	0.117	Opening			#49 (-0.011 m; -0.063 m; 0.103 m)	0.089775	0.166	Opening
							#50 (0.010 m; -0.060 m; 0.103 m)	0.00186457	0.022	Opening			#50 (-0.012 m; -0.063 m; 0.103 m)	0.0906051	0.213	Opening
								Total Filtration		1			#51 (-0.014 m; -0.063 m; 0.103 m)	0.0910383	0.254	Opening
													#52 (6.150e-04 m; -0.063 m; 0.103 m)	0.0891687	0.06	Opening
													#53 (0.002 m; -0.063 m; 0.103 m)	0.0889193	0.063	Opening
													#54 (0.003 m; -0.063 m; 0.103 m)	0.0886668	0.066	Opening
													#55 (0.005 m; -0.063 m; 0.103 m)	0.0882323	0.072	Opening
													#56 (0.006 m; -0.063 m; 0.103 m)	0.0876663	0.083	Opening
													#57 (0.007 m; -0.063 m; 0.103 m)	0.0872182	0.1	Opening
													#58 (0.008 m; -0.063 m; 0.103 m)	0.088221	0.123	Opening
													#59 (0.010 m; -0.063 m; 0.103 m)	0.0905688	0.155	Opening
													#60 (0.011 m; -0.063 m; 0.103 m)	0.0929789	0.196	Opening
													#61 (0.012 m; -0.063 m; 0.103 m)	0.0958641	0.259	Opening
													#62 (-3.982e-05 m; -0.062 m; 0.103 m)	0.0903029	0.062	Opening
													#63 (-0.001 m; -0.062 m; 0.103 m)	0.0900047	0.063	Opening
													#64 (-0.003 m; -0.062 m; 0.103 m)	0.0897042	0.064	Opening
													#65 (-0.004 m; -0.062 m; 0.103 m)	0.0893931	0.066	Opening
													#66 (-0.005 m; -0.062 m; 0.103 m)	0.0889702	0.07	Opening
													#67 (-0.007 m; -0.062 m; 0.103 m)	0.0885502	0.077	Opening
													#68 (-0.008 m; -0.062 m; 0.103 m)	0.0880561	0.091	Opening
													#69 (-0.009 m; -0.062 m; 0.103 m)	0.0877531	0.115	Opening
													#70 (-0.011 m; -0.062 m; 0.103 m)	0.088992	0.147	Opening
													#71 (-0.012 m; -0.062 m; 0.103 m)	0.0908305	0.178	Opening
													#72 (-0.013 m; -0.062 m; 0.103 m)	0.091696	0.216	Opening
													#73 (-0.014 m; -0.062 m; 0.103 m)	0.0921669	0.252	Opening
													#74 (0.001 m; -0.062 m; 0.103 m)	0.0900331	0.064	Opening
													#75 (0.003 m; -0.062 m; 0.103 m)	0.0897204	0.067	Opening
													#76 (0.004 m; -0.062 m; 0.103 m)	0.0893567	0.071	Opening
													#77 (0.005 m; -0.062 m; 0.103 m)	0.088768	0.078	Opening
													#78 (0.007 m; -0.062 m; 0.103 m)	0.0879998	0.091	Opening
													#79 (0.008 m; -0.062 m; 0.103 m)	0.0884716	0.111	Opening
													#80 (0.009 m; -0.062 m; 0.103 m)	0.0897626	0.135	Opening
													#81 (0.010 m; -0.062 m; 0.103 m)	0.00188809	0.019	Opening
													#82 (0.012 m; -0.062 m; 0.103 m)	0.0949075	0.219	Opening
													#83 (0.013 m; -0.062 m; 0.103 m)	0.0984704	0.302	Opening
													#84 (-6.946e-04 m; -0.060 m; 0.103 m)	0.0915575	0.07	Opening
													#85 (-0.002 m; -0.060 m; 0.103 m)	0.0912873	0.07	Opening
													#86 (-0.003 m; -0.060 m; 0.103 m)	0.0909098	0.071	Opening
													#87 (-0.005 m; -0.060 m; 0.103 m)	0.0904203	0.072	Opening
													#88 (-0.006 m; -0.060 m; 0.103 m)	0.0898356	0.077	Opening
													#89 (-0.007 m; -0.060 m; 0.103 m)	0.0892101	0.087	Opening
													#90 (-0.009 m; -0.060 m; 0.103 m)	0.0886386	0.11	Opening
													#91 (-0.010 m; -0.060 m; 0.103 m)	0.0889357	0.139	Opening
													#92 (-0.011 m; -0.060 m; 0.103 m)	0.0900577	0.168	Opening
													#93 (-0.012 m; -0.060 m; 0.103 m)	0.0913194	0.191	Opening
													#94 (-0.014 m; -0.060 m; 0.103 m)	0.0921947	0.215	Opening
													#95 (6.150e-04 m; -0.060 m; 0.103 m)	0.0915582	0.07	Opening
													#96 (0.002 m; -0.060 m; 0.103 m)	0.0912293	0.072	Opening
													#97 (0.003 m; -0.060 m; 0.103 m)	0.0907544	0.075	Opening
													#98 (0.005 m; -0.060 m; 0.103 m)	0.0902668	0.079	Opening
													#99 (0.006 m; -0.060 m; 0.103 m)	0.089594	0.087	Opening
													#100 (0.007 m; -0.060 m; 0.103 m)	0.0891364	0.103	Opening
													#101 (0.008 m; -0.060 m; 0.103 m)	0.00117515	0.014	Opening
														Total Filtration		1

## Sheet: .5um Speaking
	Injection 4						Injection 5						Injection 6
	.5um Speaking Velocity with total of 25 Injection points						.5um Speaking Velocity with total of 50 Injection points						.5um Speaking Velocity with total of 100 Injection points
	Initial Injection Location	Total Distance [m]	Residence Time [s]	Result (Particle Fate)			Initial Injection Location	Total Distance [m]	Residence Time [s]	Result (Particle Fate)			Initial Injection Location	Total Distance [m]	Residence Time [s]	Result (Particle Fate)
	#1 (-6.946e-04 m; -0.065 m; 0.103 m)	0.0917762	0.03	Opening			#1 (-6.946e-04 m; -0.066 m; 0.103 m)	0.0912993	0.03	Opening			#1 (-6.946e-04 m; -0.066 m; 0.103 m)	0.0911777	0.03	Opening
	#2 (-0.003 m; -0.065 m; 0.103 m)	0.0912853	0.031	Opening			#2 (-0.003 m; -0.066 m; 0.103 m)	0.0909023	0.032	Opening			#2 (-0.002 m; -0.066 m; 0.103 m)	0.0909268	0.031	Opening
	#3 (-0.005 m; -0.065 m; 0.103 m)	0.0933048	0.035	Opening			#3 (-0.005 m; -0.066 m; 0.103 m)	0.09283	0.036	Opening			#3 (-0.003 m; -0.066 m; 0.103 m)	0.091043	0.033	Opening
	#4 (-0.007 m; -0.065 m; 0.103 m)	0.0529952	0.024	Absorbed			#4 (-0.007 m; -0.066 m; 0.103 m)	0.0533682	0.024	Absorbed			#4 (-0.005 m; -0.066 m; 0.103 m)	0.0922576	0.035	Opening
	#5 (-0.010 m; -0.065 m; 0.103 m)	0.0505643	0.031	Absorbed			#5 (-0.009 m; -0.066 m; 0.103 m)	0.050363	0.033	Absorbed			#5 (-0.006 m; -0.066 m; 0.103 m)	0.0725564	0.03	Absorbed
	#6 (-0.012 m; -0.065 m; 0.103 m)	0.0524687	0.038	Absorbed			#6 (-0.011 m; -0.066 m; 0.103 m)	0.0517401	0.039	Absorbed			#6 (-0.007 m; -0.066 m; 0.103 m)	0.0530513	0.025	Absorbed
	#7 (-0.014 m; -0.065 m; 0.103 m)	0.0536297	0.049	Absorbed			#7 (0.001 m; -0.066 m; 0.103 m)	0.0914373	0.031	Opening			#7 (-0.009 m; -0.066 m; 0.103 m)	0.0501908	0.031	Absorbed
	#8 (0.002 m; -0.065 m; 0.103 m)	0.0918633	0.03	Opening			#8 (0.004 m; -0.066 m; 0.103 m)	0.0919509	0.033	Opening			#8 (-0.010 m; -0.066 m; 0.103 m)	0.0504214	0.035	Absorbed
	#9 (0.004 m; -0.065 m; 0.103 m)	0.0926735	0.033	Opening			#9 (0.006 m; -0.066 m; 0.103 m)	0.0726977	0.032	Absorbed			#9 (6.150e-04 m; -0.066 m; 0.103 m)	0.0913031	0.03	Opening
	#10 (0.006 m; -0.065 m; 0.103 m)	0.0682213	0.031	Absorbed			#10 (0.008 m; -0.066 m; 0.103 m)	0.196541	0.309	Absorbed			#10 (0.002 m; -0.066 m; 0.103 m)	0.0913376	0.031	Opening
	#11 (0.008 m; -0.065 m; 0.103 m)	0.0638578	0.034	Absorbed			#11 (0.010 m; -0.066 m; 0.103 m)	0.199658	0.303	Absorbed			#11 (0.003 m; -0.066 m; 0.103 m)	0.0916274	0.033	Opening
	#12 (0.010 m; -0.065 m; 0.103 m)	0.0648743	0.042	Absorbed			#12 (0.012 m; -0.066 m; 0.103 m)	0.2023	0.307	Absorbed			#12 (0.005 m; -0.066 m; 0.103 m)	0.092613	0.036	Opening
	#13 (0.013 m; -0.065 m; 0.103 m)	0.0653846	0.051	Absorbed			#13 (-6.946e-04 m; -0.064 m; 0.103 m)	0.0923223	0.029	Opening			#13 (0.006 m; -0.066 m; 0.103 m)	0.0719204	0.033	Absorbed
	#14 (4.097e-04 m; -0.061 m; 0.103 m)	0.0599937	0.016	Absorbed			#14 (-0.003 m; -0.064 m; 0.103 m)	0.091654	0.031	Opening			#14 (0.007 m; -0.066 m; 0.103 m)	0.567582	1.731	Absorbed
	#15 (-0.002 m; -0.061 m; 0.103 m)	0.0604772	0.016	Absorbed			#15 (-0.005 m; -0.064 m; 0.103 m)	0.0933376	0.035	Opening			#15 (0.008 m; -0.066 m; 0.103 m)	0.196676	0.311	Absorbed
	#16 (-0.004 m; -0.061 m; 0.103 m)	0.0581088	0.016	Absorbed			#16 (-0.007 m; -0.064 m; 0.103 m)	0.0537036	0.022	Absorbed			#16 (0.010 m; -0.066 m; 0.103 m)	0.197812	0.307	Absorbed
	#17 (-0.006 m; -0.061 m; 0.103 m)	0.0535497	0.019	Absorbed			#17 (-0.009 m; -0.064 m; 0.103 m)	0.0500863	0.03	Absorbed			#17 (0.011 m; -0.066 m; 0.103 m)	0.199294	0.306	Absorbed
	#18 (-0.008 m; -0.061 m; 0.103 m)	0.0495707	0.025	Absorbed			#18 (-0.011 m; -0.064 m; 0.103 m)	0.0518841	0.036	Absorbed			#18 (0.012 m; -0.066 m; 0.103 m)	0.199939	0.306	Absorbed
	#19 (-0.011 m; -0.061 m; 0.103 m)	0.050592	0.032	Absorbed			#19 (-0.014 m; -0.064 m; 0.103 m)	0.0538045	0.046	Absorbed			#19 (-3.982e-05 m; -0.065 m; 0.103 m)	0.0920396	0.029	Opening
	#20 (-0.013 m; -0.061 m; 0.103 m)	0.0524838	0.04	Absorbed			#20 (0.001 m; -0.064 m; 0.103 m)	0.0923091	0.03	Opening			#20 (-0.001 m; -0.065 m; 0.103 m)	0.0918267	0.03	Opening
	#21 (0.003 m; -0.061 m; 0.103 m)	0.0577874	0.016	Absorbed			#21 (0.004 m; -0.064 m; 0.103 m)	0.0932673	0.033	Opening			#21 (-0.003 m; -0.065 m; 0.103 m)	0.0914761	0.031	Opening
	#22 (0.005 m; -0.061 m; 0.103 m)	0.0571415	0.019	Absorbed			#22 (0.006 m; -0.064 m; 0.103 m)	0.068851	0.03	Absorbed			#22 (-0.004 m; -0.065 m; 0.103 m)	0.0918477	0.033	Opening
	#23 (0.007 m; -0.061 m; 0.103 m)	0.055009	0.024	Absorbed			#23 (0.008 m; -0.064 m; 0.103 m)	0.0565207	0.028	Absorbed			#23 (-0.005 m; -0.065 m; 0.103 m)	0.0936515	0.036	Opening
	#24 (0.009 m; -0.061 m; 0.103 m)	0.0566152	0.029	Absorbed			#24 (0.010 m; -0.064 m; 0.103 m)	0.0581437	0.035	Absorbed			#24 (-0.007 m; -0.065 m; 0.103 m)	0.0549631	0.021	Absorbed
	#25 (0.011 m; -0.061 m; 0.103 m)	0.0577526	0.038	Absorbed			#25 (0.012 m; -0.064 m; 0.103 m)	0.0597214	0.044	Absorbed			#25 (-0.008 m; -0.065 m; 0.103 m)	0.051032	0.026	Absorbed
		Total Filtration		0.2			#26 (-6.946e-04 m; -0.062 m; 0.103 m)	0.0935309	0.031	Opening			#26 (-0.009 m; -0.065 m; 0.103 m)	0.0503573	0.03	Absorbed
							#27 (-0.003 m; -0.062 m; 0.103 m)	0.092898	0.032	Opening			#27 (-0.011 m; -0.065 m; 0.103 m)	0.0512851	0.033	Absorbed
							#28 (-0.005 m; -0.062 m; 0.103 m)	0.0564755	0.017	Absorbed			#28 (-0.012 m; -0.065 m; 0.103 m)	0.0523828	0.037	Absorbed
							#29 (-0.007 m; -0.062 m; 0.103 m)	0.0522505	0.021	Absorbed			#29 (-0.013 m; -0.065 m; 0.103 m)	0.0535356	0.044	Absorbed
							#30 (-0.009 m; -0.062 m; 0.103 m)	0.0495382	0.028	Absorbed			#30 (-0.014 m; -0.065 m; 0.103 m)	0.0537622	0.052	Absorbed
							#31 (-0.011 m; -0.062 m; 0.103 m)	0.0514197	0.035	Absorbed			#31 (0.001 m; -0.065 m; 0.103 m)	0.092049	0.03	Opening
							#32 (-0.014 m; -0.062 m; 0.103 m)	0.0535069	0.043	Absorbed			#32 (0.003 m; -0.065 m; 0.103 m)	0.092096	0.031	Opening
							#33 (0.001 m; -0.062 m; 0.103 m)	0.0933997	0.031	Opening			#33 (0.004 m; -0.065 m; 0.103 m)	0.093135	0.034	Opening
							#34 (0.004 m; -0.062 m; 0.103 m)	0.0951329	0.034	Opening			#34 (0.005 m; -0.065 m; 0.103 m)	0.0954272	0.038	Opening
							#35 (0.006 m; -0.062 m; 0.103 m)	0.0566335	0.021	Absorbed			#35 (0.007 m; -0.065 m; 0.103 m)	0.0657009	0.03	Absorbed
							#36 (0.008 m; -0.062 m; 0.103 m)	0.0560484	0.027	Absorbed			#36 (0.008 m; -0.065 m; 0.103 m)	0.0630184	0.033	Absorbed
							#37 (0.010 m; -0.062 m; 0.103 m)	0.0580093	0.033	Absorbed			#37 (0.009 m; -0.065 m; 0.103 m)	0.0577162	0.033	Absorbed
							#38 (0.012 m; -0.062 m; 0.103 m)	0.0589731	0.042	Absorbed			#38 (0.010 m; -0.065 m; 0.103 m)	0.0589745	0.038	Absorbed
							#39 (-6.946e-04 m; -0.060 m; 0.103 m)	0.0526633	0.015	Absorbed			#39 (0.012 m; -0.065 m; 0.103 m)	0.060043	0.044	Absorbed
							#40 (-0.003 m; -0.060 m; 0.103 m)	0.0530287	0.016	Absorbed			#40 (0.013 m; -0.065 m; 0.103 m)	0.0606177	0.048	Absorbed
							#41 (-0.005 m; -0.060 m; 0.103 m)	0.052202	0.016	Absorbed			#41 (-6.946e-04 m; -0.063 m; 0.103 m)	0.0929221	0.03	Opening
							#42 (-0.007 m; -0.060 m; 0.103 m)	0.0505485	0.02	Absorbed			#42 (-0.002 m; -0.063 m; 0.103 m)	0.0925587	0.03	Opening
							#43 (-0.009 m; -0.060 m; 0.103 m)	0.0498705	0.027	Absorbed			#43 (-0.003 m; -0.063 m; 0.103 m)	0.0920453	0.031	Opening
							#44 (-0.011 m; -0.060 m; 0.103 m)	0.051309	0.034	Absorbed			#44 (-0.005 m; -0.063 m; 0.103 m)	0.0928079	0.034	Opening
							#45 (-0.014 m; -0.060 m; 0.103 m)	0.052724	0.042	Absorbed			#45 (-0.006 m; -0.063 m; 0.103 m)	0.0561548	0.019	Absorbed
							#46 (0.001 m; -0.060 m; 0.103 m)	0.0523964	0.015	Absorbed			#46 (-0.007 m; -0.063 m; 0.103 m)	0.0530305	0.022	Absorbed
							#47 (0.004 m; -0.060 m; 0.103 m)	0.0536695	0.017	Absorbed			#47 (-0.009 m; -0.063 m; 0.103 m)	0.0499197	0.027	Absorbed
							#48 (0.006 m; -0.060 m; 0.103 m)	0.0550961	0.02	Absorbed			#48 (-0.010 m; -0.063 m; 0.103 m)	0.0501867	0.031	Absorbed
							#49 (0.008 m; -0.060 m; 0.103 m)	0.0549112	0.024	Absorbed			#49 (-0.011 m; -0.063 m; 0.103 m)	0.0513309	0.035	Absorbed
							#50 (0.010 m; -0.060 m; 0.103 m)	0.055628	0.031	Absorbed			#50 (-0.012 m; -0.063 m; 0.103 m)	0.0526415	0.039	Absorbed
								Total Filtration		0.28			#51 (-0.014 m; -0.063 m; 0.103 m)	0.0538087	0.045	Absorbed
													#52 (6.150e-04 m; -0.063 m; 0.103 m)	0.0929206	0.03	Opening
													#53 (0.002 m; -0.063 m; 0.103 m)	0.0926469	0.031	Opening
													#54 (0.003 m; -0.063 m; 0.103 m)	0.0934956	0.033	Opening
													#55 (0.005 m; -0.063 m; 0.103 m)	0.0958818	0.036	Opening
													#56 (0.006 m; -0.063 m; 0.103 m)	0.0671263	0.028	Absorbed
													#57 (0.007 m; -0.063 m; 0.103 m)	0.0559058	0.025	Absorbed
													#58 (0.008 m; -0.063 m; 0.103 m)	0.0558446	0.029	Absorbed
													#59 (0.010 m; -0.063 m; 0.103 m)	0.0579892	0.033	Absorbed
													#60 (0.011 m; -0.063 m; 0.103 m)	0.0591774	0.038	Absorbed
													#61 (0.012 m; -0.063 m; 0.103 m)	0.0588706	0.044	Absorbed
													#62 (-3.982e-05 m; -0.062 m; 0.103 m)	0.0939016	0.032	Opening
													#63 (-0.001 m; -0.062 m; 0.103 m)	0.0939405	0.032	Opening
													#64 (-0.003 m; -0.062 m; 0.103 m)	0.0934077	0.032	Opening
													#65 (-0.004 m; -0.062 m; 0.103 m)	0.0584499	0.016	Absorbed
													#66 (-0.005 m; -0.062 m; 0.103 m)	0.0558334	0.017	Absorbed
													#67 (-0.007 m; -0.062 m; 0.103 m)	0.0535831	0.02	Absorbed
													#68 (-0.008 m; -0.062 m; 0.103 m)	0.0500724	0.023	Absorbed
													#69 (-0.009 m; -0.062 m; 0.103 m)	0.0494639	0.027	Absorbed
													#70 (-0.011 m; -0.062 m; 0.103 m)	0.0504287	0.031	Absorbed
													#71 (-0.012 m; -0.062 m; 0.103 m)	0.0517148	0.036	Absorbed
													#72 (-0.013 m; -0.062 m; 0.103 m)	0.0529058	0.041	Absorbed
													#73 (-0.014 m; -0.062 m; 0.103 m)	0.0541138	0.047	Absorbed
													#74 (0.001 m; -0.062 m; 0.103 m)	0.0938375	0.032	Opening
													#75 (0.003 m; -0.062 m; 0.103 m)	0.0581767	0.016	Absorbed
													#76 (0.004 m; -0.062 m; 0.103 m)	0.0574072	0.017	Absorbed
													#77 (0.005 m; -0.062 m; 0.103 m)	0.0570505	0.02	Absorbed
													#78 (0.007 m; -0.062 m; 0.103 m)	0.0556592	0.023	Absorbed
													#79 (0.008 m; -0.062 m; 0.103 m)	0.0556639	0.026	Absorbed
													#80 (0.009 m; -0.062 m; 0.103 m)	0.0568526	0.029	Absorbed
													#81 (0.010 m; -0.062 m; 0.103 m)	0.0579078	0.034	Absorbed
													#82 (0.012 m; -0.062 m; 0.103 m)	0.0581318	0.04	Absorbed
													#83 (0.013 m; -0.062 m; 0.103 m)	0.0581232	0.043	Absorbed
													#84 (-6.946e-04 m; -0.060 m; 0.103 m)	0.0519857	0.016	Absorbed
													#85 (-0.002 m; -0.060 m; 0.103 m)	0.0522374	0.016	Absorbed
													#86 (-0.003 m; -0.060 m; 0.103 m)	0.052002	0.016	Absorbed
													#87 (-0.005 m; -0.060 m; 0.103 m)	0.0517806	0.016	Absorbed
													#88 (-0.006 m; -0.060 m; 0.103 m)	0.0514366	0.017	Absorbed
													#89 (-0.007 m; -0.060 m; 0.103 m)	0.0503255	0.02	Absorbed
													#90 (-0.009 m; -0.060 m; 0.103 m)	0.0497775	0.024	Absorbed
													#91 (-0.010 m; -0.060 m; 0.103 m)	0.0504615	0.029	Absorbed
													#92 (-0.011 m; -0.060 m; 0.103 m)	0.051143	0.033	Absorbed
													#93 (-0.012 m; -0.060 m; 0.103 m)	0.0520163	0.038	Absorbed
													#94 (-0.014 m; -0.060 m; 0.103 m)	0.0527488	0.043	Absorbed
													#95 (6.150e-04 m; -0.060 m; 0.103 m)	0.0516621	0.015	Absorbed
													#96 (0.002 m; -0.060 m; 0.103 m)	0.0517909	0.015	Absorbed
													#97 (0.003 m; -0.060 m; 0.103 m)	0.0526088	0.016	Absorbed
													#98 (0.005 m; -0.060 m; 0.103 m)	0.0539786	0.018	Absorbed
													#99 (0.006 m; -0.060 m; 0.103 m)	0.0546065	0.02	Absorbed
													#100 (0.007 m; -0.060 m; 0.103 m)	0.0543633	0.023	Absorbed
													#101 (0.008 m; -0.060 m; 0.103 m)	0.0551133	0.025	Absorbed
														Total Filtration		0.287129

## Sheet: .5um Coughing
	Injection 7					Injection 8					Injection 9
	.5um Coughing with total of 25 Injection points					.5um Coughing with total of 50 Injection points					.5um Coughing with total of 100 Injection points
	Initial Injection Location	Total Distance [m]	Residence Time [s]	Result (Particle Fate)		Initial Injection Location	Total Distance [m]	Residence Time [s]	Result (Particle Fate)		Initial Injection Location	Total Distance [m]	Residence Time [s]	Result (Particle Fate)
	#1 (-6.946e-04 m; -0.065 m; 0.103 m)	0.0743613	0.008	Absorbed		#1 (-6.946e-04 m; -0.066 m; 0.103 m)	0.385882	0.24	Interpolation failed		#1 (-6.946e-04 m; -0.066 m; 0.103 m)	0.384274	0.239	Interpolation failed
	#2 (-0.003 m; -0.065 m; 0.103 m)	0.0724599	0.007	Absorbed		#2 (-0.003 m; -0.066 m; 0.103 m)	0.0707312	0.007	Absorbed		#2 (-0.002 m; -0.066 m; 0.103 m)	0.378713	0.207	Interpolation failed
	#3 (-0.005 m; -0.065 m; 0.103 m)	0.225454	0.12	Absorbed		#3 (-0.005 m; -0.066 m; 0.103 m)	0.230755	0.103	Absorbed		#3 (-0.003 m; -0.066 m; 0.103 m)	0.0699087	0.007	Absorbed
	#4 (-0.007 m; -0.065 m; 0.103 m)	0.0547326	0.007	Absorbed		#4 (-0.007 m; -0.066 m; 0.103 m)	0.0601494	0.008	Absorbed		#4 (-0.005 m; -0.066 m; 0.103 m)	0.355267	0.225	Interpolation failed
	#5 (-0.010 m; -0.065 m; 0.103 m)	0.0507228	0.007	Absorbed		#5 (-0.009 m; -0.066 m; 0.103 m)	0.0514064	0.008	Absorbed		#5 (-0.006 m; -0.066 m; 0.103 m)	0.381828	0.132	Absorbed
	#6 (-0.012 m; -0.065 m; 0.103 m)	0.00175892	0.0005367	Opening		#6 (-0.011 m; -0.066 m; 0.103 m)	0.0461665	0.005	Absorbed		#6 (-0.007 m; -0.066 m; 0.103 m)	0.0599582	0.008	Absorbed
	#7 (-0.014 m; -0.065 m; 0.103 m)	0.00285525	0.0009617	Opening		#7 (0.001 m; -0.066 m; 0.103 m)	0.131217	0.02	Absorbed		#7 (-0.009 m; -0.066 m; 0.103 m)	0.0537856	0.008	Absorbed
	#8 (0.002 m; -0.065 m; 0.103 m)	0.127198	0.018	Absorbed		#8 (0.004 m; -0.066 m; 0.103 m)	0.361042	0.198	Interpolation failed		#8 (-0.010 m; -0.066 m; 0.103 m)	0.0515324	0.007	Absorbed
	#9 (0.004 m; -0.065 m; 0.103 m)	0.362667	0.198	Interpolation failed		#9 (0.006 m; -0.066 m; 0.103 m)	0.0536383	0.008	Absorbed		#9 (6.150e-04 m; -0.066 m; 0.103 m)	0.125984	0.018	Absorbed
	#10 (0.006 m; -0.065 m; 0.103 m)	0.0518137	0.007	Absorbed		#10 (0.008 m; -0.066 m; 0.103 m)	0.0502693	0.007	Absorbed		#10 (0.002 m; -0.066 m; 0.103 m)	0.184375	0.035	Absorbed
	#11 (0.008 m; -0.065 m; 0.103 m)	0.0500536	0.007	Absorbed		#11 (0.010 m; -0.066 m; 0.103 m)	0.0541955	0.007	Absorbed		#11 (0.003 m; -0.066 m; 0.103 m)	0.362704	0.198	Interpolation failed
	#12 (0.010 m; -0.065 m; 0.103 m)	0.0540368	0.007	Absorbed		#12 (0.012 m; -0.066 m; 0.103 m)	0.0610352	0.011	Absorbed		#12 (0.005 m; -0.066 m; 0.103 m)	0.0611722	0.007	Absorbed
	#13 (0.013 m; -0.065 m; 0.103 m)	0.308363	0.339	Interpolation failed		#13 (-6.946e-04 m; -0.064 m; 0.103 m)	0.100484	0.014	Opening		#13 (0.006 m; -0.066 m; 0.103 m)	0.05332	0.008	Absorbed
	#14 (4.097e-04 m; -0.061 m; 0.103 m)	0.0535538	0.004	Absorbed		#14 (-0.003 m; -0.064 m; 0.103 m)	0.0754083	0.008	Absorbed		#14 (0.007 m; -0.066 m; 0.103 m)	0.0507246	0.007	Absorbed
	#15 (-0.002 m; -0.061 m; 0.103 m)	0.0542214	0.004	Absorbed		#15 (-0.005 m; -0.064 m; 0.103 m)	0.230545	0.11	Absorbed		#15 (0.008 m; -0.066 m; 0.103 m)	0.0449711	0.006	Absorbed
	#16 (-0.004 m; -0.061 m; 0.103 m)	0.052667	0.004	Absorbed		#16 (-0.007 m; -0.064 m; 0.103 m)	0.0531071	0.006	Absorbed		#16 (0.010 m; -0.066 m; 0.103 m)	0.0536894	0.007	Absorbed
	#17 (-0.006 m; -0.061 m; 0.103 m)	0.0497435	0.005	Absorbed		#17 (-0.009 m; -0.064 m; 0.103 m)	0.049871	0.006	Absorbed		#17 (0.011 m; -0.066 m; 0.103 m)	0.0034543	0.001	Opening
	#18 (-0.008 m; -0.061 m; 0.103 m)	0.0481544	0.005	Absorbed		#18 (-0.011 m; -0.064 m; 0.103 m)	0.00105256	0.0002801	Opening		#18 (0.012 m; -0.066 m; 0.103 m)	0.308409	0.323	Interpolation failed
	#19 (-0.011 m; -0.061 m; 0.103 m)	0.0507115	0.006	Absorbed		#19 (-0.014 m; -0.064 m; 0.103 m)	0.00162807	0.0005272	Opening		#19 (-3.982e-05 m; -0.065 m; 0.103 m)	0.081241	0.009	Absorbed
	#20 (-0.013 m; -0.061 m; 0.103 m)	0.00548508	0.002	Absorbed		#20 (0.001 m; -0.064 m; 0.103 m)	0.10108	0.015	Opening		#20 (-0.001 m; -0.065 m; 0.103 m)	0.0741021	0.008	Absorbed
	#21 (0.003 m; -0.061 m; 0.103 m)	0.0520823	0.004	Absorbed		#21 (0.004 m; -0.064 m; 0.103 m)	0.366385	0.199	Interpolation failed		#21 (-0.003 m; -0.065 m; 0.103 m)	0.0734378	0.008	Absorbed
	#22 (0.005 m; -0.061 m; 0.103 m)	0.0495736	0.005	Absorbed		#22 (0.006 m; -0.064 m; 0.103 m)	0.0511755	0.006	Absorbed		#22 (-0.004 m; -0.065 m; 0.103 m)	0.0707823	0.007	Absorbed
	#23 (0.007 m; -0.061 m; 0.103 m)	0.0485691	0.006	Absorbed		#23 (0.008 m; -0.064 m; 0.103 m)	0.0493034	0.006	Absorbed		#23 (-0.005 m; -0.065 m; 0.103 m)	0.373801	0.377	Interpolation failed
	#24 (0.009 m; -0.061 m; 0.103 m)	0.0508713	0.006	Absorbed		#24 (0.010 m; -0.064 m; 0.103 m)	0.0529135	0.007	Absorbed		#24 (-0.007 m; -0.065 m; 0.103 m)	0.0566462	0.006	Absorbed
	#25 (0.011 m; -0.061 m; 0.103 m)	0.0560105	0.01	Absorbed		#25 (0.012 m; -0.064 m; 0.103 m)	0.0594889	0.01	Absorbed		#25 (-0.008 m; -0.065 m; 0.103 m)	0.0529086	0.007	Absorbed
		Total Filtration		0.08		#26 (-6.946e-04 m; -0.062 m; 0.103 m)	0.100815	0.015	Opening		#26 (-0.009 m; -0.065 m; 0.103 m)	0.0504698	0.007	Absorbed
		Potentially Escaped		0.08		#27 (-0.003 m; -0.062 m; 0.103 m)	0.0990046	0.015	Opening		#27 (-0.011 m; -0.065 m; 0.103 m)	0.0424221	0.004	Absorbed
						#28 (-0.005 m; -0.062 m; 0.103 m)	0.0553925	0.005	Absorbed		#28 (-0.012 m; -0.065 m; 0.103 m)	0.00139924	0.0004138	Opening
						#29 (-0.007 m; -0.062 m; 0.103 m)	0.0496069	0.005	Absorbed		#29 (-0.013 m; -0.065 m; 0.103 m)	0.00143858	0.0004793	Opening
						#30 (-0.009 m; -0.062 m; 0.103 m)	0.0486446	0.006	Absorbed		#30 (-0.014 m; -0.065 m; 0.103 m)	0.0115643	0.004	Absorbed
						#31 (-0.011 m; -0.062 m; 0.103 m)	0.00118033	0.0003069	Opening		#31 (0.001 m; -0.065 m; 0.103 m)	0.0727396	0.007	Absorbed
						#32 (-0.014 m; -0.062 m; 0.103 m)	0.00697709	0.003	Absorbed		#32 (0.003 m; -0.065 m; 0.103 m)	0.370817	0.207	Absorbed
						#33 (0.001 m; -0.062 m; 0.103 m)	0.0600281	0.004	Absorbed		#33 (0.004 m; -0.065 m; 0.103 m)	0.362154	0.199	Absorbed
						#34 (0.004 m; -0.062 m; 0.103 m)	0.0558818	0.005	Absorbed		#34 (0.005 m; -0.065 m; 0.103 m)	0.0542982	0.006	Absorbed
						#35 (0.006 m; -0.062 m; 0.103 m)	0.0490543	0.005	Absorbed		#35 (0.007 m; -0.065 m; 0.103 m)	0.050301	0.006	Absorbed
						#36 (0.008 m; -0.062 m; 0.103 m)	0.0492829	0.006	Absorbed		#36 (0.008 m; -0.065 m; 0.103 m)	0.0494375	0.006	Absorbed
						#37 (0.010 m; -0.062 m; 0.103 m)	0.0523167	0.007	Absorbed		#37 (0.009 m; -0.065 m; 0.103 m)	0.0516062	0.007	Absorbed
						#38 (0.012 m; -0.062 m; 0.103 m)	0.00841951	0.003	Absorbed		#38 (0.010 m; -0.065 m; 0.103 m)	0.0539698	0.007	Absorbed
						#39 (-6.946e-04 m; -0.060 m; 0.103 m)	0.0505199	0.004	Absorbed		#39 (0.012 m; -0.065 m; 0.103 m)	0.00332062	0.001	Opening
						#40 (-0.003 m; -0.060 m; 0.103 m)	0.0498674	0.004	Absorbed		#40 (0.013 m; -0.065 m; 0.103 m)	0.719736	0.503	Interpolation failed
						#41 (-0.005 m; -0.060 m; 0.103 m)	0.0491655	0.004	Absorbed		#41 (-6.946e-04 m; -0.063 m; 0.103 m)	0.10044	0.014	Opening
						#42 (-0.007 m; -0.060 m; 0.103 m)	0.0482194	0.005	Absorbed		#42 (-0.002 m; -0.063 m; 0.103 m)	0.0998427	0.014	Opening
						#43 (-0.009 m; -0.060 m; 0.103 m)	0.0489767	0.006	Absorbed		#43 (-0.003 m; -0.063 m; 0.103 m)	0.079636	0.01	Absorbed
						#44 (-0.011 m; -0.060 m; 0.103 m)	0.0479334	0.007	Absorbed		#44 (-0.005 m; -0.063 m; 0.103 m)	0.0702818	0.007	Absorbed
						#45 (-0.014 m; -0.060 m; 0.103 m)	0.00677791	0.002	Absorbed		#45 (-0.006 m; -0.063 m; 0.103 m)	0.055644	0.005	Absorbed
						#46 (0.001 m; -0.060 m; 0.103 m)	0.0501158	0.004	Absorbed		#46 (-0.007 m; -0.063 m; 0.103 m)	0.0511126	0.006	Absorbed
						#47 (0.004 m; -0.060 m; 0.103 m)	0.049625	0.005	Absorbed		#47 (-0.009 m; -0.063 m; 0.103 m)	0.049346	0.006	Absorbed
						#48 (0.006 m; -0.060 m; 0.103 m)	0.0485874	0.005	Absorbed		#48 (-0.010 m; -0.063 m; 0.103 m)	0.0493961	0.006	Absorbed
						#49 (0.008 m; -0.060 m; 0.103 m)	0.049433	0.006	Absorbed		#49 (-0.011 m; -0.063 m; 0.103 m)	0.00102313	0.000243	Opening
						#50 (0.010 m; -0.060 m; 0.103 m)	0.0521536	0.007	Absorbed		#50 (-0.012 m; -0.063 m; 0.103 m)	0.00100915	0.000266	Opening
							Total Filtration		0.14		#51 (-0.014 m; -0.063 m; 0.103 m)	0.00782921	0.003	Absorbed
							Potentially Escaped		0.06		#52 (6.150e-04 m; -0.063 m; 0.103 m)	0.100837	0.015	Opening
											#53 (0.002 m; -0.063 m; 0.103 m)	0.101824	0.015	Opening
											#54 (0.003 m; -0.063 m; 0.103 m)	0.0592498	0.005	Absorbed
											#55 (0.005 m; -0.063 m; 0.103 m)	0.0549545	0.005	Absorbed
											#56 (0.006 m; -0.063 m; 0.103 m)	0.0498037	0.006	Absorbed
											#57 (0.007 m; -0.063 m; 0.103 m)	0.048714	0.006	Absorbed
											#58 (0.008 m; -0.063 m; 0.103 m)	0.0499527	0.006	Absorbed
											#59 (0.010 m; -0.063 m; 0.103 m)	0.0520651	0.007	Absorbed
											#60 (0.011 m; -0.063 m; 0.103 m)	0.00173604	0.0004804	Opening
											#61 (0.012 m; -0.063 m; 0.103 m)	0.00944991	0.003	Absorbed
											#62 (-3.982e-05 m; -0.062 m; 0.103 m)	0.0573788	0.004	Absorbed
											#63 (-0.001 m; -0.062 m; 0.103 m)	0.0604853	0.004	Absorbed
											#64 (-0.003 m; -0.062 m; 0.103 m)	0.0577107	0.004	Absorbed
											#65 (-0.004 m; -0.062 m; 0.103 m)	0.0544457	0.004	Absorbed
											#66 (-0.005 m; -0.062 m; 0.103 m)	0.0525239	0.004	Absorbed
											#67 (-0.007 m; -0.062 m; 0.103 m)	0.0497004	0.005	Absorbed
											#68 (-0.008 m; -0.062 m; 0.103 m)	0.0484492	0.005	Absorbed
											#69 (-0.009 m; -0.062 m; 0.103 m)	0.0484375	0.006	Absorbed
											#70 (-0.011 m; -0.062 m; 0.103 m)	0.050495	0.006	Absorbed
											#71 (-0.012 m; -0.062 m; 0.103 m)	0.0525687	0.007	Absorbed
											#72 (-0.013 m; -0.062 m; 0.103 m)	0.00596765	0.002	Absorbed
											#73 (-0.014 m; -0.062 m; 0.103 m)	0.00981889	0.003	Absorbed
											#74 (0.001 m; -0.062 m; 0.103 m)	0.0544058	0.004	Absorbed
											#75 (0.003 m; -0.062 m; 0.103 m)	0.0535784	0.004	Absorbed
											#76 (0.004 m; -0.062 m; 0.103 m)	0.0528488	0.004	Absorbed
											#77 (0.005 m; -0.062 m; 0.103 m)	0.049448	0.005	Absorbed
											#78 (0.007 m; -0.062 m; 0.103 m)	0.0485037	0.005	Absorbed
											#79 (0.008 m; -0.062 m; 0.103 m)	0.0492942	0.006	Absorbed
											#80 (0.009 m; -0.062 m; 0.103 m)	0.0507686	0.006	Absorbed
											#81 (0.010 m; -0.062 m; 0.103 m)	0.0524091	0.007	Absorbed
											#82 (0.012 m; -0.062 m; 0.103 m)	0.00779258	0.002	Absorbed
											#83 (0.013 m; -0.062 m; 0.103 m)	0.40949	0.444	Absorbed
											#84 (-6.946e-04 m; -0.060 m; 0.103 m)	0.0498466	0.004	Absorbed
											#85 (-0.002 m; -0.060 m; 0.103 m)	0.0494816	0.004	Absorbed
											#86 (-0.003 m; -0.060 m; 0.103 m)	0.0493138	0.004	Absorbed
											#87 (-0.005 m; -0.060 m; 0.103 m)	0.0490492	0.005	Absorbed
											#88 (-0.006 m; -0.060 m; 0.103 m)	0.048588	0.005	Absorbed
											#89 (-0.007 m; -0.060 m; 0.103 m)	0.0481389	0.005	Absorbed
											#90 (-0.009 m; -0.060 m; 0.103 m)	0.0482611	0.005	Absorbed
											#91 (-0.010 m; -0.060 m; 0.103 m)	0.049819	0.006	Absorbed
											#92 (-0.011 m; -0.060 m; 0.103 m)	0.0500782	0.007	Absorbed
											#93 (-0.012 m; -0.060 m; 0.103 m)	0.00447782	0.002	Absorbed
											#94 (-0.014 m; -0.060 m; 0.103 m)	0.00752459	0.003	Absorbed
											#95 (6.150e-04 m; -0.060 m; 0.103 m)	0.0498311	0.004	Absorbed
											#96 (0.002 m; -0.060 m; 0.103 m)	0.0495967	0.004	Absorbed
											#97 (0.003 m; -0.060 m; 0.103 m)	0.0494363	0.005	Absorbed
											#98 (0.005 m; -0.060 m; 0.103 m)	0.0491492	0.005	Absorbed
											#99 (0.006 m; -0.060 m; 0.103 m)	0.0485899	0.005	Absorbed
											#100 (0.007 m; -0.060 m; 0.103 m)	0.0487927	0.006	Absorbed
											#101 (0.008 m; -0.060 m; 0.103 m)	0.0500446	0.006	Absorbed
												Total Filtration		0.108911
												Potentially Escaped		0.0693069

## Sheet: 1um Mouth Breathing
	Injection 10						Injection 11						Injection 12
	1um Mouth Breathing with total of 25 Injection points						1um Mouth Breathing with total of 50 Injection points						1um Mouth Breathing with total of 100 Injection points
	Initial Injection Location	Total Distance [m]	Residence Time [s]	Result (Particle Fate)			Initial Injection Location	Total Distance [m]	Residence Time [s]	Result (Particle Fate)			Initial Injection Location	Total Distance [m]	Residence Time [s]	Result (Particle Fate)
	#1 (-6.946e-04 m; -0.065 m; 0.103 m)	0.0880567	0.058	Opening			#1 (-6.946e-04 m; -0.066 m; 0.103 m)	0.0876055	0.06	Opening			#1 (-6.946e-04 m; -0.066 m; 0.103 m)	0.0875167	0.06	Opening
	#2 (-0.003 m; -0.065 m; 0.103 m)	0.0877071	0.062	Opening			#2 (-0.003 m; -0.066 m; 0.103 m)	0.0872898	0.063	Opening			#2 (-0.002 m; -0.066 m; 0.103 m)	0.0873212	0.062	Opening
	#3 (-0.005 m; -0.065 m; 0.103 m)	0.0872905	0.07	Opening			#3 (-0.005 m; -0.066 m; 0.103 m)	0.0869228	0.072	Opening			#3 (-0.003 m; -0.066 m; 0.103 m)	0.0871417	0.065	Opening
	#4 (-0.007 m; -0.065 m; 0.103 m)	0.0868382	0.088	Opening			#4 (-0.007 m; -0.066 m; 0.103 m)	0.086543	0.09	Opening			#4 (-0.005 m; -0.066 m; 0.103 m)	0.0869122	0.07	Opening
	#5 (-0.010 m; -0.065 m; 0.103 m)	0.0875148	0.132	Opening			#5 (-0.009 m; -0.066 m; 0.103 m)	0.0869904	0.134	Opening			#5 (-0.006 m; -0.066 m; 0.103 m)	0.0866865	0.079	Opening
	#6 (-0.012 m; -0.065 m; 0.103 m)	0.0887902	0.206	Opening			#6 (-0.011 m; -0.066 m; 0.103 m)	0.0880861	0.2	Opening			#6 (-0.007 m; -0.066 m; 0.103 m)	0.0864703	0.093	Opening
	#7 (-0.014 m; -0.065 m; 0.103 m)	0.0904422	0.281	Opening			#7 (0.001 m; -0.066 m; 0.103 m)	0.087562	0.063	Opening			#7 (-0.009 m; -0.066 m; 0.103 m)	0.0865	0.118	Opening
	#8 (0.002 m; -0.065 m; 0.103 m)	0.0880037	0.062	Opening			#8 (0.004 m; -0.066 m; 0.103 m)	0.0872138	0.07	Opening			#8 (-0.010 m; -0.066 m; 0.103 m)	0.0870409	0.151	Opening
	#9 (0.004 m; -0.065 m; 0.103 m)	0.0875796	0.069	Opening			#9 (0.006 m; -0.066 m; 0.103 m)	0.0866142	0.088	Opening			#9 (6.150e-04 m; -0.066 m; 0.103 m)	0.0875807	0.061	Opening
	#10 (0.006 m; -0.065 m; 0.103 m)	0.0868762	0.087	Opening			#10 (0.008 m; -0.066 m; 0.103 m)	0.0874522	0.124	Opening			#10 (0.002 m; -0.066 m; 0.103 m)	0.0874211	0.065	Opening
	#11 (0.008 m; -0.065 m; 0.103 m)	0.0873796	0.125	Opening			#11 (0.010 m; -0.066 m; 0.103 m)	0.0907016	0.173	Opening			#11 (0.003 m; -0.066 m; 0.103 m)	0.0872198	0.069	Opening
	#12 (0.010 m; -0.065 m; 0.103 m)	0.0912715	0.178	Opening			#12 (0.012 m; -0.066 m; 0.103 m)	0.094723	0.289	Opening			#12 (0.005 m; -0.066 m; 0.103 m)	0.0868955	0.077	Opening
	#13 (0.013 m; -0.065 m; 0.103 m)	0.0955639	0.302	Opening			#13 (-6.946e-04 m; -0.064 m; 0.103 m)	0.0885357	0.058	Opening			#13 (0.006 m; -0.066 m; 0.103 m)	0.0865347	0.09	Opening
	#14 (4.097e-04 m; -0.061 m; 0.103 m)	0.0905238	0.064	Opening			#14 (-0.003 m; -0.064 m; 0.103 m)	0.0881878	0.061	Opening			#14 (0.007 m; -0.066 m; 0.103 m)	0.0866065	0.111	Opening
	#15 (-0.002 m; -0.061 m; 0.103 m)	0.0902155	0.064	Opening			#15 (-0.005 m; -0.064 m; 0.103 m)	0.0877426	0.068	Opening			#15 (0.008 m; -0.066 m; 0.103 m)	0.0881452	0.136	Opening
	#16 (-0.004 m; -0.061 m; 0.103 m)	0.089643	0.067	Opening			#16 (-0.007 m; -0.064 m; 0.103 m)	0.0872348	0.083	Opening			#16 (0.010 m; -0.066 m; 0.103 m)	0.0902644	0.166	Opening
	#17 (-0.006 m; -0.061 m; 0.103 m)	0.088876	0.075	Opening			#17 (-0.009 m; -0.064 m; 0.103 m)	0.0874762	0.121	Opening			#17 (0.011 m; -0.066 m; 0.103 m)	0.0925081	0.215	Opening
	#18 (-0.008 m; -0.061 m; 0.103 m)	0.0880467	0.1	Opening			#18 (-0.011 m; -0.064 m; 0.103 m)	0.0895604	0.187	Opening			#18 (0.012 m; -0.066 m; 0.103 m)	0.0943583	0.309	Opening
	#19 (-0.011 m; -0.061 m; 0.103 m)	0.0892023	0.151	Opening			#19 (-0.014 m; -0.064 m; 0.103 m)	0.0904167	0.261	Opening			#19 (-3.982e-05 m; -0.065 m; 0.103 m)	0.0883639	0.058	Opening
	#20 (-0.013 m; -0.061 m; 0.103 m)	0.0916971	0.204	Opening			#20 (0.001 m; -0.064 m; 0.103 m)	0.0884829	0.061	Opening			#20 (-0.001 m; -0.065 m; 0.103 m)	0.0881328	0.059	Opening
	#21 (0.003 m; -0.061 m; 0.103 m)	0.0899924	0.068	Opening			#21 (0.004 m; -0.064 m; 0.103 m)	0.0880639	0.068	Opening			#21 (-0.003 m; -0.065 m; 0.103 m)	0.0879308	0.061	Opening
	#22 (0.005 m; -0.061 m; 0.103 m)	0.0891908	0.077	Opening			#22 (0.006 m; -0.064 m; 0.103 m)	0.0872936	0.082	Opening			#22 (-0.004 m; -0.065 m; 0.103 m)	0.0876929	0.064	Opening
	#23 (0.007 m; -0.061 m; 0.103 m)	0.0881446	0.1	Opening			#23 (0.008 m; -0.064 m; 0.103 m)	0.0872411	0.115	Opening			#23 (-0.005 m; -0.065 m; 0.103 m)	0.0874233	0.07	Opening
	#24 (0.009 m; -0.061 m; 0.103 m)	0.0901042	0.138	Opening			#24 (0.010 m; -0.064 m; 0.103 m)	0.0907661	0.166	Opening			#24 (-0.007 m; -0.065 m; 0.103 m)	0.087147	0.079	Opening
	#25 (0.011 m; -0.061 m; 0.103 m)	0.0942616	0.209	Opening			#25 (0.012 m; -0.064 m; 0.103 m)	0.0953565	0.255	Opening			#25 (-0.008 m; -0.065 m; 0.103 m)	0.0868475	0.096	Opening
		Total Filtration		1			#26 (-6.946e-04 m; -0.062 m; 0.103 m)	0.0897316	0.061	Opening			#26 (-0.009 m; -0.065 m; 0.103 m)	0.0873077	0.122	Opening
							#27 (-0.003 m; -0.062 m; 0.103 m)	0.0892803	0.063	Opening			#27 (-0.011 m; -0.065 m; 0.103 m)	0.088554	0.158	Opening
							#28 (-0.005 m; -0.062 m; 0.103 m)	0.0887248	0.068	Opening			#28 (-0.012 m; -0.065 m; 0.103 m)	0.0891103	0.206	Opening
							#29 (-0.007 m; -0.062 m; 0.103 m)	0.0880585	0.082	Opening			#29 (-0.013 m; -0.065 m; 0.103 m)	0.0898328	0.251	Opening
							#30 (-0.009 m; -0.062 m; 0.103 m)	0.0875815	0.117	Opening			#30 (-0.014 m; -0.065 m; 0.103 m)	0.0910798	0.291	Opening
							#31 (-0.011 m; -0.062 m; 0.103 m)	0.090326	0.169	Opening			#31 (0.001 m; -0.065 m; 0.103 m)	0.0882081	0.061	Opening
							#32 (-0.014 m; -0.062 m; 0.103 m)	0.0915268	0.237	Opening			#32 (0.003 m; -0.065 m; 0.103 m)	0.0879977	0.065	Opening
							#33 (0.001 m; -0.062 m; 0.103 m)	0.0895917	0.063	Opening			#33 (0.004 m; -0.065 m; 0.103 m)	0.0876952	0.07	Opening
							#34 (0.004 m; -0.062 m; 0.103 m)	0.0890997	0.069	Opening			#34 (0.005 m; -0.065 m; 0.103 m)	0.0872623	0.078	Opening
							#35 (0.006 m; -0.062 m; 0.103 m)	0.0881412	0.082	Opening			#35 (0.007 m; -0.065 m; 0.103 m)	0.0868431	0.093	Opening
							#36 (0.008 m; -0.062 m; 0.103 m)	0.0880229	0.112	Opening			#36 (0.008 m; -0.065 m; 0.103 m)	0.0870191	0.116	Opening
							#37 (0.010 m; -0.062 m; 0.103 m)	0.00208626	0.019	Opening			#37 (0.009 m; -0.065 m; 0.103 m)	0.0891941	0.145	Opening
							#38 (0.012 m; -0.062 m; 0.103 m)	0.0955289	0.243	Opening			#38 (0.010 m; -0.065 m; 0.103 m)	0.0914256	0.18	Opening
							#39 (-6.946e-04 m; -0.060 m; 0.103 m)	0.0913677	0.069	Opening			#39 (0.012 m; -0.065 m; 0.103 m)	0.0939546	0.234	Opening
							#40 (-0.003 m; -0.060 m; 0.103 m)	0.0908541	0.069	Opening			#40 (0.013 m; -0.065 m; 0.103 m)	0.0955726	0.343	Opening
							#41 (-0.005 m; -0.060 m; 0.103 m)	0.0900817	0.072	Opening			#41 (-6.946e-04 m; -0.063 m; 0.103 m)	0.0891072	0.059	Opening
							#42 (-0.007 m; -0.060 m; 0.103 m)	0.0891205	0.085	Opening			#42 (-0.002 m; -0.063 m; 0.103 m)	0.0888568	0.06	Opening
							#43 (-0.009 m; -0.060 m; 0.103 m)	0.08849	0.123	Opening			#43 (-0.003 m; -0.063 m; 0.103 m)	0.0886297	0.062	Opening
							#44 (-0.011 m; -0.060 m; 0.103 m)	0.090299	0.172	Opening			#44 (-0.005 m; -0.063 m; 0.103 m)	0.0883069	0.066	Opening
							#45 (-0.014 m; -0.060 m; 0.103 m)	0.0920953	0.213	Opening			#45 (-0.006 m; -0.063 m; 0.103 m)	0.0879741	0.072	Opening
							#46 (0.001 m; -0.060 m; 0.103 m)	0.0911686	0.07	Opening			#46 (-0.007 m; -0.063 m; 0.103 m)	0.0876023	0.083	Opening
							#47 (0.004 m; -0.060 m; 0.103 m)	0.0904607	0.075	Opening			#47 (-0.009 m; -0.063 m; 0.103 m)	0.0872257	0.103	Opening
							#48 (0.006 m; -0.060 m; 0.103 m)	0.0894499	0.086	Opening			#48 (-0.010 m; -0.063 m; 0.103 m)	0.0879882	0.131	Opening
							#49 (0.008 m; -0.060 m; 0.103 m)	0.0895934	0.117	Opening			#49 (-0.011 m; -0.063 m; 0.103 m)	0.0897744	0.166	Opening
							#50 (0.010 m; -0.060 m; 0.103 m)	0.00186502	0.022	Opening			#50 (-0.012 m; -0.063 m; 0.103 m)	0.0906047	0.213	Opening
								Total Filtration		1			#51 (-0.014 m; -0.063 m; 0.103 m)	0.0910391	0.254	Opening
													#52 (6.150e-04 m; -0.063 m; 0.103 m)	0.0891681	0.06	Opening
													#53 (0.002 m; -0.063 m; 0.103 m)	0.0889189	0.063	Opening
													#54 (0.003 m; -0.063 m; 0.103 m)	0.0886645	0.066	Opening
													#55 (0.005 m; -0.063 m; 0.103 m)	0.0882318	0.072	Opening
													#56 (0.006 m; -0.063 m; 0.103 m)	0.0876644	0.083	Opening
													#57 (0.007 m; -0.063 m; 0.103 m)	0.0872179	0.1	Opening
													#58 (0.008 m; -0.063 m; 0.103 m)	0.0882209	0.123	Opening
													#59 (0.010 m; -0.063 m; 0.103 m)	0.0905697	0.155	Opening
													#60 (0.011 m; -0.063 m; 0.103 m)	0.0929811	0.196	Opening
													#61 (0.012 m; -0.063 m; 0.103 m)	0.0958686	0.259	Opening
													#62 (-3.982e-05 m; -0.062 m; 0.103 m)	0.0903017	0.062	Opening
													#63 (-0.001 m; -0.062 m; 0.103 m)	0.0900042	0.063	Opening
													#64 (-0.003 m; -0.062 m; 0.103 m)	0.0897034	0.064	Opening
													#65 (-0.004 m; -0.062 m; 0.103 m)	0.0893926	0.066	Opening
													#66 (-0.005 m; -0.062 m; 0.103 m)	0.0889697	0.07	Opening
													#67 (-0.007 m; -0.062 m; 0.103 m)	0.0885498	0.077	Opening
													#68 (-0.008 m; -0.062 m; 0.103 m)	0.0880557	0.091	Opening
													#69 (-0.009 m; -0.062 m; 0.103 m)	0.0877528	0.115	Opening
													#70 (-0.011 m; -0.062 m; 0.103 m)	0.0889922	0.147	Opening
													#71 (-0.012 m; -0.062 m; 0.103 m)	0.0908311	0.178	Opening
													#72 (-0.013 m; -0.062 m; 0.103 m)	0.0916964	0.216	Opening
													#73 (-0.014 m; -0.062 m; 0.103 m)	0.0921677	0.252	Opening
													#74 (0.001 m; -0.062 m; 0.103 m)	0.0900324	0.064	Opening
													#75 (0.003 m; -0.062 m; 0.103 m)	0.0897347	0.067	Opening
													#76 (0.004 m; -0.062 m; 0.103 m)	0.0893562	0.071	Opening
													#77 (0.005 m; -0.062 m; 0.103 m)	0.0887676	0.078	Opening
													#78 (0.007 m; -0.062 m; 0.103 m)	0.0879993	0.091	Opening
													#79 (0.008 m; -0.062 m; 0.103 m)	0.0884713	0.111	Opening
													#80 (0.009 m; -0.062 m; 0.103 m)	0.0897627	0.135	Opening
													#81 (0.010 m; -0.062 m; 0.103 m)	0.00188845	0.019	Opening
													#82 (0.012 m; -0.062 m; 0.103 m)	0.0949111	0.219	Opening
													#83 (0.013 m; -0.062 m; 0.103 m)	0.0984721	0.302	Opening
													#84 (-6.946e-04 m; -0.060 m; 0.103 m)	0.0915566	0.07	Opening
													#85 (-0.002 m; -0.060 m; 0.103 m)	0.0912872	0.07	Opening
													#86 (-0.003 m; -0.060 m; 0.103 m)	0.0909097	0.071	Opening
													#87 (-0.005 m; -0.060 m; 0.103 m)	0.0904198	0.072	Opening
													#88 (-0.006 m; -0.060 m; 0.103 m)	0.0898351	0.077	Opening
													#89 (-0.007 m; -0.060 m; 0.103 m)	0.0892096	0.087	Opening
													#90 (-0.009 m; -0.060 m; 0.103 m)	0.0886381	0.11	Opening
													#91 (-0.010 m; -0.060 m; 0.103 m)	0.0889355	0.139	Opening
													#92 (-0.011 m; -0.060 m; 0.103 m)	0.0900581	0.168	Opening
													#93 (-0.012 m; -0.060 m; 0.103 m)	0.0913208	0.191	Opening
													#94 (-0.014 m; -0.060 m; 0.103 m)	0.0921957	0.215	Opening
													#95 (6.150e-04 m; -0.060 m; 0.103 m)	0.0915574	0.07	Opening
													#96 (0.002 m; -0.060 m; 0.103 m)	0.0912292	0.072	Opening
													#97 (0.003 m; -0.060 m; 0.103 m)	0.0907537	0.075	Opening
													#98 (0.005 m; -0.060 m; 0.103 m)	0.0902662	0.079	Opening
													#99 (0.006 m; -0.060 m; 0.103 m)	0.0895933	0.087	Opening
													#100 (0.007 m; -0.060 m; 0.103 m)	0.0891356	0.103	Opening
													#101 (0.008 m; -0.060 m; 0.103 m)	0.00117543	0.014	Opening
														Total Filtration		1

## Sheet: 1um Speaking
	Injection 13						Injection 14						Injection 15
	1um Speaking with total of 25 Injection points						1um Speaking with total of 50 Injection points						1um Speaking with total of 100 Injection points
	Initial Injection Location	Total Distance [m]	Residence Time [s]	Result (Particle Fate)			Initial Injection Location	Total Distance [m]	Residence Time [s]	Result (Particle Fate)			Initial Injection Location	Total Distance [m]	Residence Time [s]	Result (Particle Fate)
	#1 (-6.946e-04 m; -0.065 m; 0.103 m)	0.0917871	0.03	Opening			#1 (-6.946e-04 m; -0.066 m; 0.103 m)	0.091282	0.03	Opening			#1 (-6.946e-04 m; -0.066 m; 0.103 m)	0.0911776	0.03	Opening
	#2 (-0.003 m; -0.065 m; 0.103 m)	0.0912838	0.031	Opening			#2 (-0.003 m; -0.066 m; 0.103 m)	0.0909132	0.032	Opening			#2 (-0.002 m; -0.066 m; 0.103 m)	0.0909241	0.031	Opening
	#3 (-0.005 m; -0.065 m; 0.103 m)	0.0933038	0.035	Opening			#3 (-0.005 m; -0.066 m; 0.103 m)	0.0928292	0.036	Opening			#3 (-0.003 m; -0.066 m; 0.103 m)	0.0910406	0.033	Opening
	#4 (-0.007 m; -0.065 m; 0.103 m)	0.052996	0.024	Absorbed			#4 (-0.007 m; -0.066 m; 0.103 m)	0.0533695	0.024	Absorbed			#4 (-0.005 m; -0.066 m; 0.103 m)	0.0922559	0.035	Opening
	#5 (-0.010 m; -0.065 m; 0.103 m)	0.0505645	0.031	Absorbed			#5 (-0.009 m; -0.066 m; 0.103 m)	0.0503633	0.033	Absorbed			#5 (-0.006 m; -0.066 m; 0.103 m)	0.0724987	0.03	Absorbed
	#6 (-0.012 m; -0.065 m; 0.103 m)	0.0524688	0.038	Absorbed			#6 (-0.011 m; -0.066 m; 0.103 m)	0.0517397	0.039	Absorbed			#6 (-0.007 m; -0.066 m; 0.103 m)	0.0530518	0.025	Absorbed
	#7 (-0.014 m; -0.065 m; 0.103 m)	0.0536295	0.049	Absorbed			#7 (0.001 m; -0.066 m; 0.103 m)	0.0914376	0.031	Opening			#7 (-0.009 m; -0.066 m; 0.103 m)	0.0501914	0.031	Absorbed
	#8 (0.002 m; -0.065 m; 0.103 m)	0.0918639	0.03	Opening			#8 (0.004 m; -0.066 m; 0.103 m)	0.0919506	0.033	Opening			#8 (-0.010 m; -0.066 m; 0.103 m)	0.0504214	0.035	Absorbed
	#9 (0.004 m; -0.065 m; 0.103 m)	0.0927009	0.033	Opening			#9 (0.006 m; -0.066 m; 0.103 m)	0.0726924	0.032	Absorbed			#9 (6.150e-04 m; -0.066 m; 0.103 m)	0.0913035	0.03	Opening
	#10 (0.006 m; -0.065 m; 0.103 m)	0.0682199	0.031	Absorbed			#10 (0.008 m; -0.066 m; 0.103 m)	0.196558	0.309	Absorbed			#10 (0.002 m; -0.066 m; 0.103 m)	0.0913377	0.031	Opening
	#11 (0.008 m; -0.065 m; 0.103 m)	0.0638418	0.034	Absorbed			#11 (0.010 m; -0.066 m; 0.103 m)	0.199647	0.303	Absorbed			#11 (0.003 m; -0.066 m; 0.103 m)	0.0916277	0.033	Opening
	#12 (0.010 m; -0.065 m; 0.103 m)	0.0648831	0.042	Absorbed			#12 (0.012 m; -0.066 m; 0.103 m)	0.202371	0.307	Absorbed			#12 (0.005 m; -0.066 m; 0.103 m)	0.0926131	0.036	Opening
	#13 (0.013 m; -0.065 m; 0.103 m)	0.0653798	0.051	Absorbed			#13 (-6.946e-04 m; -0.064 m; 0.103 m)	0.0923246	0.029	Opening			#13 (0.006 m; -0.066 m; 0.103 m)	0.0719146	0.033	Absorbed
	#14 (4.097e-04 m; -0.061 m; 0.103 m)	0.0599836	0.016	Absorbed			#14 (-0.003 m; -0.064 m; 0.103 m)	0.091651	0.031	Opening			#14 (0.007 m; -0.066 m; 0.103 m)	0.412731	1.168	Absorbed
	#15 (-0.002 m; -0.061 m; 0.103 m)	0.0604835	0.016	Absorbed			#15 (-0.005 m; -0.064 m; 0.103 m)	0.0933329	0.035	Opening			#15 (0.008 m; -0.066 m; 0.103 m)	0.196683	0.311	Absorbed
	#16 (-0.004 m; -0.061 m; 0.103 m)	0.0580818	0.016	Absorbed			#16 (-0.007 m; -0.064 m; 0.103 m)	0.053707	0.022	Absorbed			#16 (0.010 m; -0.066 m; 0.103 m)	0.197814	0.307	Absorbed
	#17 (-0.006 m; -0.061 m; 0.103 m)	0.0534647	0.019	Absorbed			#17 (-0.009 m; -0.064 m; 0.103 m)	0.0500981	0.03	Absorbed			#17 (0.011 m; -0.066 m; 0.103 m)	0.199287	0.307	Absorbed
	#18 (-0.008 m; -0.061 m; 0.103 m)	0.0495724	0.025	Absorbed			#18 (-0.011 m; -0.064 m; 0.103 m)	0.0518848	0.036	Absorbed			#18 (0.012 m; -0.066 m; 0.103 m)	0.199937	0.306	Absorbed
	#19 (-0.011 m; -0.061 m; 0.103 m)	0.0505936	0.032	Absorbed			#19 (-0.014 m; -0.064 m; 0.103 m)	0.0538052	0.046	Absorbed			#19 (-3.982e-05 m; -0.065 m; 0.103 m)	0.0920413	0.029	Opening
	#20 (-0.013 m; -0.061 m; 0.103 m)	0.0524808	0.04	Absorbed			#20 (0.001 m; -0.064 m; 0.103 m)	0.0923089	0.03	Opening			#20 (-0.001 m; -0.065 m; 0.103 m)	0.0918218	0.03	Opening
	#21 (0.003 m; -0.061 m; 0.103 m)	0.0578129	0.016	Absorbed			#21 (0.004 m; -0.064 m; 0.103 m)	0.0932621	0.033	Opening			#21 (-0.003 m; -0.065 m; 0.103 m)	0.0914758	0.031	Opening
	#22 (0.005 m; -0.061 m; 0.103 m)	0.0571395	0.019	Absorbed			#22 (0.006 m; -0.064 m; 0.103 m)	0.068734	0.03	Absorbed			#22 (-0.004 m; -0.065 m; 0.103 m)	0.0918469	0.033	Opening
	#23 (0.007 m; -0.061 m; 0.103 m)	0.0549602	0.024	Absorbed			#23 (0.008 m; -0.064 m; 0.103 m)	0.056524	0.028	Absorbed			#23 (-0.005 m; -0.065 m; 0.103 m)	0.0936486	0.036	Opening
	#24 (0.009 m; -0.061 m; 0.103 m)	0.0566185	0.029	Absorbed			#24 (0.010 m; -0.064 m; 0.103 m)	0.0581583	0.035	Absorbed			#24 (-0.007 m; -0.065 m; 0.103 m)	0.0549645	0.021	Absorbed
	#25 (0.011 m; -0.061 m; 0.103 m)	0.0577565	0.038	Absorbed			#25 (0.012 m; -0.064 m; 0.103 m)	0.0597219	0.044	Absorbed			#25 (-0.008 m; -0.065 m; 0.103 m)	0.0510341	0.026	Absorbed
		Total Filtration		0.2			#26 (-6.946e-04 m; -0.062 m; 0.103 m)	0.0935224	0.031	Opening			#26 (-0.009 m; -0.065 m; 0.103 m)	0.0503576	0.03	Absorbed
							#27 (-0.003 m; -0.062 m; 0.103 m)	0.0928936	0.032	Opening			#27 (-0.011 m; -0.065 m; 0.103 m)	0.0512971	0.033	Absorbed
							#28 (-0.005 m; -0.062 m; 0.103 m)	0.0564834	0.017	Absorbed			#28 (-0.012 m; -0.065 m; 0.103 m)	0.0524778	0.037	Absorbed
							#29 (-0.007 m; -0.062 m; 0.103 m)	0.0522517	0.021	Absorbed			#29 (-0.013 m; -0.065 m; 0.103 m)	0.0535362	0.044	Absorbed
							#30 (-0.009 m; -0.062 m; 0.103 m)	0.0495386	0.028	Absorbed			#30 (-0.014 m; -0.065 m; 0.103 m)	0.0537622	0.052	Absorbed
							#31 (-0.011 m; -0.062 m; 0.103 m)	0.0514203	0.035	Absorbed			#31 (0.001 m; -0.065 m; 0.103 m)	0.0920466	0.03	Opening
							#32 (-0.014 m; -0.062 m; 0.103 m)	0.0535075	0.043	Absorbed			#32 (0.003 m; -0.065 m; 0.103 m)	0.0920952	0.031	Opening
							#33 (0.001 m; -0.062 m; 0.103 m)	0.0933878	0.031	Opening			#33 (0.004 m; -0.065 m; 0.103 m)	0.0931375	0.034	Opening
							#34 (0.004 m; -0.062 m; 0.103 m)	0.0951717	0.034	Opening			#34 (0.005 m; -0.065 m; 0.103 m)	0.0954277	0.038	Opening
							#35 (0.006 m; -0.062 m; 0.103 m)	0.0566407	0.021	Absorbed			#35 (0.007 m; -0.065 m; 0.103 m)	0.065701	0.03	Absorbed
							#36 (0.008 m; -0.062 m; 0.103 m)	0.0561563	0.026	Absorbed			#36 (0.008 m; -0.065 m; 0.103 m)	0.0631039	0.033	Absorbed
							#37 (0.010 m; -0.062 m; 0.103 m)	0.0578173	0.033	Absorbed			#37 (0.009 m; -0.065 m; 0.103 m)	0.0577176	0.033	Absorbed
							#38 (0.012 m; -0.062 m; 0.103 m)	0.058976	0.042	Absorbed			#38 (0.010 m; -0.065 m; 0.103 m)	0.0589745	0.038	Absorbed
							#39 (-6.946e-04 m; -0.060 m; 0.103 m)	0.0526616	0.015	Absorbed			#39 (0.012 m; -0.065 m; 0.103 m)	0.0600088	0.043	Absorbed
							#40 (-0.003 m; -0.060 m; 0.103 m)	0.0530306	0.016	Absorbed			#40 (0.013 m; -0.065 m; 0.103 m)	0.0605339	0.048	Absorbed
							#41 (-0.005 m; -0.060 m; 0.103 m)	0.0521737	0.016	Absorbed			#41 (-6.946e-04 m; -0.063 m; 0.103 m)	0.0929194	0.03	Opening
							#42 (-0.007 m; -0.060 m; 0.103 m)	0.050549	0.02	Absorbed			#42 (-0.002 m; -0.063 m; 0.103 m)	0.0925555	0.03	Opening
							#43 (-0.009 m; -0.060 m; 0.103 m)	0.049872	0.027	Absorbed			#43 (-0.003 m; -0.063 m; 0.103 m)	0.0920421	0.031	Opening
							#44 (-0.011 m; -0.060 m; 0.103 m)	0.0513103	0.034	Absorbed			#44 (-0.005 m; -0.063 m; 0.103 m)	0.092815	0.034	Opening
							#45 (-0.014 m; -0.060 m; 0.103 m)	0.0527242	0.042	Absorbed			#45 (-0.006 m; -0.063 m; 0.103 m)	0.0561552	0.019	Absorbed
							#46 (0.001 m; -0.060 m; 0.103 m)	0.0523916	0.015	Absorbed			#46 (-0.007 m; -0.063 m; 0.103 m)	0.052914	0.022	Absorbed
							#47 (0.004 m; -0.060 m; 0.103 m)	0.0536855	0.017	Absorbed			#47 (-0.009 m; -0.063 m; 0.103 m)	0.0499205	0.027	Absorbed
							#48 (0.006 m; -0.060 m; 0.103 m)	0.0550956	0.02	Absorbed			#48 (-0.010 m; -0.063 m; 0.103 m)	0.0501869	0.031	Absorbed
							#49 (0.008 m; -0.060 m; 0.103 m)	0.0549137	0.024	Absorbed			#49 (-0.011 m; -0.063 m; 0.103 m)	0.0513313	0.035	Absorbed
							#50 (0.010 m; -0.060 m; 0.103 m)	0.05563	0.031	Absorbed			#50 (-0.012 m; -0.063 m; 0.103 m)	0.0526423	0.039	Absorbed
								Total Filtration		0.24			#51 (-0.014 m; -0.063 m; 0.103 m)	0.0538535	0.045	Absorbed
													#52 (6.150e-04 m; -0.063 m; 0.103 m)	0.0929152	0.03	Opening
													#53 (0.002 m; -0.063 m; 0.103 m)	0.0926739	0.031	Opening
													#54 (0.003 m; -0.063 m; 0.103 m)	0.0934982	0.033	Opening
													#55 (0.005 m; -0.063 m; 0.103 m)	0.0958644	0.036	Opening
													#56 (0.006 m; -0.063 m; 0.103 m)	0.0671186	0.028	Absorbed
													#57 (0.007 m; -0.063 m; 0.103 m)	0.0559063	0.025	Absorbed
													#58 (0.008 m; -0.063 m; 0.103 m)	0.0558542	0.029	Absorbed
													#59 (0.010 m; -0.063 m; 0.103 m)	0.0579912	0.033	Absorbed
													#60 (0.011 m; -0.063 m; 0.103 m)	0.0591895	0.038	Absorbed
													#61 (0.012 m; -0.063 m; 0.103 m)	0.0588912	0.044	Absorbed
													#62 (-3.982e-05 m; -0.062 m; 0.103 m)	0.0939026	0.032	Opening
													#63 (-0.001 m; -0.062 m; 0.103 m)	0.0939547	0.032	Opening
													#64 (-0.003 m; -0.062 m; 0.103 m)	0.0934172	0.032	Opening
													#65 (-0.004 m; -0.062 m; 0.103 m)	0.0584816	0.016	Absorbed
													#66 (-0.005 m; -0.062 m; 0.103 m)	0.0557696	0.017	Absorbed
													#67 (-0.007 m; -0.062 m; 0.103 m)	0.0535658	0.02	Absorbed
													#68 (-0.008 m; -0.062 m; 0.103 m)	0.0500739	0.023	Absorbed
													#69 (-0.009 m; -0.062 m; 0.103 m)	0.0494648	0.027	Absorbed
													#70 (-0.011 m; -0.062 m; 0.103 m)	0.0504296	0.031	Absorbed
													#71 (-0.012 m; -0.062 m; 0.103 m)	0.0517161	0.036	Absorbed
													#72 (-0.013 m; -0.062 m; 0.103 m)	0.0529069	0.041	Absorbed
													#73 (-0.014 m; -0.062 m; 0.103 m)	0.0541145	0.047	Absorbed
													#74 (0.001 m; -0.062 m; 0.103 m)	0.0938446	0.032	Opening
													#75 (0.003 m; -0.062 m; 0.103 m)	0.0582037	0.016	Absorbed
													#76 (0.004 m; -0.062 m; 0.103 m)	0.057409	0.017	Absorbed
													#77 (0.005 m; -0.062 m; 0.103 m)	0.0570509	0.02	Absorbed
													#78 (0.007 m; -0.062 m; 0.103 m)	0.0556612	0.023	Absorbed
													#79 (0.008 m; -0.062 m; 0.103 m)	0.0556472	0.026	Absorbed
													#80 (0.009 m; -0.062 m; 0.103 m)	0.0566913	0.029	Absorbed
													#81 (0.010 m; -0.062 m; 0.103 m)	0.0579112	0.034	Absorbed
													#82 (0.012 m; -0.062 m; 0.103 m)	0.0581356	0.04	Absorbed
													#83 (0.013 m; -0.062 m; 0.103 m)	0.0581263	0.043	Absorbed
													#84 (-6.946e-04 m; -0.060 m; 0.103 m)	0.0519655	0.016	Absorbed
													#85 (-0.002 m; -0.060 m; 0.103 m)	0.0522057	0.016	Absorbed
													#86 (-0.003 m; -0.060 m; 0.103 m)	0.0519917	0.016	Absorbed
													#87 (-0.005 m; -0.060 m; 0.103 m)	0.0517807	0.016	Absorbed
													#88 (-0.006 m; -0.060 m; 0.103 m)	0.0514397	0.017	Absorbed
													#89 (-0.007 m; -0.060 m; 0.103 m)	0.0503255	0.02	Absorbed
													#90 (-0.009 m; -0.060 m; 0.103 m)	0.0497781	0.024	Absorbed
													#91 (-0.010 m; -0.060 m; 0.103 m)	0.0504628	0.029	Absorbed
													#92 (-0.011 m; -0.060 m; 0.103 m)	0.0511445	0.033	Absorbed
													#93 (-0.012 m; -0.060 m; 0.103 m)	0.0520179	0.038	Absorbed
													#94 (-0.014 m; -0.060 m; 0.103 m)	0.0527498	0.043	Absorbed
													#95 (6.150e-04 m; -0.060 m; 0.103 m)	0.051661	0.015	Absorbed
													#96 (0.002 m; -0.060 m; 0.103 m)	0.0517849	0.015	Absorbed
													#97 (0.003 m; -0.060 m; 0.103 m)	0.0526294	0.016	Absorbed
													#98 (0.005 m; -0.060 m; 0.103 m)	0.0539662	0.018	Absorbed
													#99 (0.006 m; -0.060 m; 0.103 m)	0.0546058	0.02	Absorbed
													#100 (0.007 m; -0.060 m; 0.103 m)	0.0543647	0.023	Absorbed
													#101 (0.008 m; -0.060 m; 0.103 m)	0.0551145	0.025	Absorbed
														Total Filtration		0.287129

## Sheet: 1um Coughing
	Injection 16						Injection 17						Injection 18
	1um Coughing with total of 25 Injection points						1um Coughing with total of 50 Injection points						1um Coughing with total of 100 Injection points
	Initial Injection Location	Total Distance [m]	Residence Time [s]	Result (Particle Fate)			Initial Injection Location	Total Distance [m]	Residence Time [s]	Result (Particle Fate)			Initial Injection Location	Total Distance [m]	Residence Time [s]	Result (Particle Fate)
	#1 (-6.946e-04 m; -0.065 m; 0.103 m)	0.0744138	0.008	Absorbed			#1 (-6.946e-04 m; -0.066 m; 0.103 m)	0.385994	0.24	Interpolation failed			#1 (-6.946e-04 m; -0.066 m; 0.103 m)	0.384307	0.24	Interpolation failed
	#2 (-0.003 m; -0.065 m; 0.103 m)	0.0724684	0.007	Absorbed			#2 (-0.003 m; -0.066 m; 0.103 m)	0.0707526	0.007	Absorbed			#2 (-0.002 m; -0.066 m; 0.103 m)	0.37881	0.207	Interpolation failed
	#3 (-0.005 m; -0.065 m; 0.103 m)	0.225965	0.117	Absorbed			#3 (-0.005 m; -0.066 m; 0.103 m)	0.231985	0.104	Absorbed			#3 (-0.003 m; -0.066 m; 0.103 m)	0.0699204	0.007	Absorbed
	#4 (-0.007 m; -0.065 m; 0.103 m)	0.0547396	0.007	Absorbed			#4 (-0.007 m; -0.066 m; 0.103 m)	0.0600579	0.008	Absorbed			#4 (-0.005 m; -0.066 m; 0.103 m)	0.355282	0.225	Interpolation failed
	#5 (-0.010 m; -0.065 m; 0.103 m)	0.0507324	0.007	Absorbed			#5 (-0.009 m; -0.066 m; 0.103 m)	0.0513211	0.008	Absorbed			#5 (-0.006 m; -0.066 m; 0.103 m)	0.391148	0.135	Absorbed
	#6 (-0.012 m; -0.065 m; 0.103 m)	0.0017709	0.0005408	Opening			#6 (-0.011 m; -0.066 m; 0.103 m)	0.0532336	0.007	Absorbed			#6 (-0.007 m; -0.066 m; 0.103 m)	0.0598347	0.008	Absorbed
	#7 (-0.014 m; -0.065 m; 0.103 m)	0.00287307	0.0009677	Opening			#7 (0.001 m; -0.066 m; 0.103 m)	0.131078	0.02	Absorbed			#7 (-0.009 m; -0.066 m; 0.103 m)	0.0536806	0.008	Absorbed
	#8 (0.002 m; -0.065 m; 0.103 m)	0.127217	0.018	Absorbed			#8 (0.004 m; -0.066 m; 0.103 m)	0.36107	0.198	Interpolation failed			#8 (-0.010 m; -0.066 m; 0.103 m)	0.0515344	0.007	Absorbed
	#9 (0.004 m; -0.065 m; 0.103 m)	0.362706	0.198	Absorbed			#9 (0.006 m; -0.066 m; 0.103 m)	0.0536221	0.008	Absorbed			#9 (6.150e-04 m; -0.066 m; 0.103 m)	0.125945	0.018	Absorbed
	#10 (0.006 m; -0.065 m; 0.103 m)	0.051804	0.007	Absorbed			#10 (0.008 m; -0.066 m; 0.103 m)	0.0441268	0.005	Absorbed			#10 (0.002 m; -0.066 m; 0.103 m)	0.184378	0.035	Absorbed
	#11 (0.008 m; -0.065 m; 0.103 m)	0.0487571	0.006	Absorbed			#11 (0.010 m; -0.066 m; 0.103 m)	0.0542341	0.007	Absorbed			#11 (0.003 m; -0.066 m; 0.103 m)	0.362685	0.198	Interpolation failed
	#12 (0.010 m; -0.065 m; 0.103 m)	0.0540869	0.007	Absorbed			#12 (0.012 m; -0.066 m; 0.103 m)	0.0609398	0.011	Absorbed			#12 (0.005 m; -0.066 m; 0.103 m)	0.0611094	0.007	Absorbed
	#13 (0.013 m; -0.065 m; 0.103 m)	0.308814	0.346	Interpolation failed			#13 (-6.946e-04 m; -0.064 m; 0.103 m)	0.100429	0.014	Opening			#13 (0.006 m; -0.066 m; 0.103 m)	0.0533049	0.008	Absorbed
	#14 (4.097e-04 m; -0.061 m; 0.103 m)	0.0535258	0.004	Absorbed			#14 (-0.003 m; -0.064 m; 0.103 m)	0.0755427	0.008	Absorbed			#14 (0.007 m; -0.066 m; 0.103 m)	0.0506945	0.007	Absorbed
	#15 (-0.002 m; -0.061 m; 0.103 m)	0.0541756	0.004	Absorbed			#15 (-0.005 m; -0.064 m; 0.103 m)	0.231142	0.109	Absorbed			#15 (0.008 m; -0.066 m; 0.103 m)	0.0450513	0.006	Absorbed
	#16 (-0.004 m; -0.061 m; 0.103 m)	0.0525959	0.004	Absorbed			#16 (-0.007 m; -0.064 m; 0.103 m)	0.0531058	0.006	Absorbed			#16 (0.010 m; -0.066 m; 0.103 m)	0.0539366	0.007	Absorbed
	#17 (-0.006 m; -0.061 m; 0.103 m)	0.049655	0.005	Absorbed			#17 (-0.009 m; -0.064 m; 0.103 m)	0.0498726	0.006	Absorbed			#17 (0.011 m; -0.066 m; 0.103 m)	0.00347692	0.001	Opening
	#18 (-0.008 m; -0.061 m; 0.103 m)	0.0481581	0.005	Absorbed			#18 (-0.011 m; -0.064 m; 0.103 m)	0.00105626	0.0002815	Opening			#18 (0.012 m; -0.066 m; 0.103 m)	0.308708	0.328	Interpolation failed
	#19 (-0.011 m; -0.061 m; 0.103 m)	0.0507461	0.006	Absorbed			#19 (-0.014 m; -0.064 m; 0.103 m)	0.00163117	0.0005285	Opening			#19 (-3.982e-05 m; -0.065 m; 0.103 m)	0.081608	0.009	Absorbed
	#20 (-0.013 m; -0.061 m; 0.103 m)	0.0054806	0.002	Absorbed			#20 (0.001 m; -0.064 m; 0.103 m)	0.101027	0.015	Opening			#20 (-0.001 m; -0.065 m; 0.103 m)	0.0741013	0.008	Absorbed
	#21 (0.003 m; -0.061 m; 0.103 m)	0.0520588	0.004	Absorbed			#21 (0.004 m; -0.064 m; 0.103 m)	0.366415	0.199	Interpolation failed			#21 (-0.003 m; -0.065 m; 0.103 m)	0.0734474	0.008	Absorbed
	#22 (0.005 m; -0.061 m; 0.103 m)	0.049581	0.005	Absorbed			#22 (0.006 m; -0.064 m; 0.103 m)	0.0512334	0.006	Absorbed			#22 (-0.004 m; -0.065 m; 0.103 m)	0.0707455	0.007	Absorbed
	#23 (0.007 m; -0.061 m; 0.103 m)	0.0485808	0.006	Absorbed			#23 (0.008 m; -0.064 m; 0.103 m)	0.049311	0.006	Absorbed			#23 (-0.005 m; -0.065 m; 0.103 m)	0.358127	0.346	Interpolation failed
	#24 (0.009 m; -0.061 m; 0.103 m)	0.050938	0.006	Absorbed			#24 (0.010 m; -0.064 m; 0.103 m)	0.0529629	0.007	Absorbed			#24 (-0.007 m; -0.065 m; 0.103 m)	0.0566235	0.006	Absorbed
	#25 (0.011 m; -0.061 m; 0.103 m)	0.00703599	0.002	Absorbed			#25 (0.012 m; -0.064 m; 0.103 m)	0.0594674	0.01	Absorbed			#25 (-0.008 m; -0.065 m; 0.103 m)	0.0528956	0.007	Absorbed
		Total Filtration		0.08			#26 (-6.946e-04 m; -0.062 m; 0.103 m)	0.100794	0.015	Opening			#26 (-0.009 m; -0.065 m; 0.103 m)	0.0504708	0.007	Absorbed
		Potentially Escaped		0.04			#27 (-0.003 m; -0.062 m; 0.103 m)	0.0989806	0.015	Opening			#27 (-0.011 m; -0.065 m; 0.103 m)	0.0508731	0.006	Absorbed
							#28 (-0.005 m; -0.062 m; 0.103 m)	0.0553699	0.005	Absorbed			#28 (-0.012 m; -0.065 m; 0.103 m)	0.00140644	0.0004164	Opening
							#29 (-0.007 m; -0.062 m; 0.103 m)	0.0496134	0.005	Absorbed			#29 (-0.013 m; -0.065 m; 0.103 m)	0.00144137	0.0004806	Opening
							#30 (-0.009 m; -0.062 m; 0.103 m)	0.0486526	0.006	Absorbed			#30 (-0.014 m; -0.065 m; 0.103 m)	0.0115924	0.004	Absorbed
							#31 (-0.011 m; -0.062 m; 0.103 m)	0.0011664	0.0003028	Opening			#31 (0.001 m; -0.065 m; 0.103 m)	0.0726879	0.007	Absorbed
							#32 (-0.014 m; -0.062 m; 0.103 m)	0.00697409	0.003	Absorbed			#32 (0.003 m; -0.065 m; 0.103 m)	0.370979	0.208	Interpolation failed
							#33 (0.001 m; -0.062 m; 0.103 m)	0.0599201	0.004	Absorbed			#33 (0.004 m; -0.065 m; 0.103 m)	0.362226	0.199	Interpolation failed
							#34 (0.004 m; -0.062 m; 0.103 m)	0.055877	0.005	Absorbed			#34 (0.005 m; -0.065 m; 0.103 m)	0.0541901	0.006	Absorbed
							#35 (0.006 m; -0.062 m; 0.103 m)	0.0490625	0.005	Absorbed			#35 (0.007 m; -0.065 m; 0.103 m)	0.0503026	0.006	Absorbed
							#36 (0.008 m; -0.062 m; 0.103 m)	0.0493256	0.006	Absorbed			#36 (0.008 m; -0.065 m; 0.103 m)	0.0494403	0.006	Absorbed
							#37 (0.010 m; -0.062 m; 0.103 m)	0.0523701	0.007	Absorbed			#37 (0.009 m; -0.065 m; 0.103 m)	0.0513294	0.007	Absorbed
							#38 (0.012 m; -0.062 m; 0.103 m)	0.00837821	0.003	Absorbed			#38 (0.010 m; -0.065 m; 0.103 m)	0.0540163	0.007	Absorbed
							#39 (-6.946e-04 m; -0.060 m; 0.103 m)	0.0505282	0.004	Absorbed			#39 (0.012 m; -0.065 m; 0.103 m)	0.00333782	0.001	Opening
							#40 (-0.003 m; -0.060 m; 0.103 m)	0.0498762	0.004	Absorbed			#40 (0.013 m; -0.065 m; 0.103 m)	0.722582	0.513	Absorbed
							#41 (-0.005 m; -0.060 m; 0.103 m)	0.0491869	0.004	Absorbed			#41 (-6.946e-04 m; -0.063 m; 0.103 m)	0.10041	0.014	Opening
							#42 (-0.007 m; -0.060 m; 0.103 m)	0.0481697	0.005	Absorbed			#42 (-0.002 m; -0.063 m; 0.103 m)	0.0997772	0.014	Opening
							#43 (-0.009 m; -0.060 m; 0.103 m)	0.0489993	0.006	Absorbed			#43 (-0.003 m; -0.063 m; 0.103 m)	0.0797274	0.01	Absorbed
							#44 (-0.011 m; -0.060 m; 0.103 m)	0.0479228	0.007	Absorbed			#44 (-0.005 m; -0.063 m; 0.103 m)	0.0703793	0.007	Absorbed
							#45 (-0.014 m; -0.060 m; 0.103 m)	0.00677919	0.002	Absorbed			#45 (-0.006 m; -0.063 m; 0.103 m)	0.0556409	0.005	Absorbed
							#46 (0.001 m; -0.060 m; 0.103 m)	0.0501215	0.004	Absorbed			#46 (-0.007 m; -0.063 m; 0.103 m)	0.0511208	0.006	Absorbed
							#47 (0.004 m; -0.060 m; 0.103 m)	0.0496338	0.005	Absorbed			#47 (-0.009 m; -0.063 m; 0.103 m)	0.0493442	0.006	Absorbed
							#48 (0.006 m; -0.060 m; 0.103 m)	0.0486032	0.005	Absorbed			#48 (-0.010 m; -0.063 m; 0.103 m)	0.0494231	0.006	Absorbed
							#49 (0.008 m; -0.060 m; 0.103 m)	0.0494634	0.006	Absorbed			#49 (-0.011 m; -0.063 m; 0.103 m)	0.00101677	0.0002416	Opening
							#50 (0.010 m; -0.060 m; 0.103 m)	0.0522006	0.007	Absorbed			#50 (-0.012 m; -0.063 m; 0.103 m)	0.00101002	0.0002663	Opening
								Total Filtration		0.14			#51 (-0.014 m; -0.063 m; 0.103 m)	0.00782997	0.003	Absorbed
								Potentially Escaped		0.06			#52 (6.150e-04 m; -0.063 m; 0.103 m)	0.100813	0.015	Opening
													#53 (0.002 m; -0.063 m; 0.103 m)	0.101669	0.015	Opening
													#54 (0.003 m; -0.063 m; 0.103 m)	0.0592358	0.005	Absorbed
													#55 (0.005 m; -0.063 m; 0.103 m)	0.0550024	0.005	Absorbed
													#56 (0.006 m; -0.063 m; 0.103 m)	0.0497995	0.006	Absorbed
													#57 (0.007 m; -0.063 m; 0.103 m)	0.0486983	0.006	Absorbed
													#58 (0.008 m; -0.063 m; 0.103 m)	0.0499732	0.006	Absorbed
													#59 (0.010 m; -0.063 m; 0.103 m)	0.0521043	0.007	Absorbed
													#60 (0.011 m; -0.063 m; 0.103 m)	0.0017411	0.0004819	Opening
													#61 (0.012 m; -0.063 m; 0.103 m)	0.0093745	0.003	Absorbed
													#62 (-3.982e-05 m; -0.062 m; 0.103 m)	0.0573587	0.004	Absorbed
													#63 (-0.001 m; -0.062 m; 0.103 m)	0.0603092	0.004	Absorbed
													#64 (-0.003 m; -0.062 m; 0.103 m)	0.0569621	0.004	Absorbed
													#65 (-0.004 m; -0.062 m; 0.103 m)	0.0543791	0.004	Absorbed
													#66 (-0.005 m; -0.062 m; 0.103 m)	0.0525562	0.004	Absorbed
													#67 (-0.007 m; -0.062 m; 0.103 m)	0.0497035	0.005	Absorbed
													#68 (-0.008 m; -0.062 m; 0.103 m)	0.0484505	0.005	Absorbed
													#69 (-0.009 m; -0.062 m; 0.103 m)	0.048446	0.006	Absorbed
													#70 (-0.011 m; -0.062 m; 0.103 m)	0.0505176	0.006	Absorbed
													#71 (-0.012 m; -0.062 m; 0.103 m)	0.0523714	0.007	Absorbed
													#72 (-0.013 m; -0.062 m; 0.103 m)	0.00596562	0.002	Absorbed
													#73 (-0.014 m; -0.062 m; 0.103 m)	0.00982935	0.003	Absorbed
													#74 (0.001 m; -0.062 m; 0.103 m)	0.054368	0.004	Absorbed
													#75 (0.003 m; -0.062 m; 0.103 m)	0.0535626	0.004	Absorbed
													#76 (0.004 m; -0.062 m; 0.103 m)	0.0528548	0.004	Absorbed
													#77 (0.005 m; -0.062 m; 0.103 m)	0.0493885	0.005	Absorbed
													#78 (0.007 m; -0.062 m; 0.103 m)	0.0485066	0.005	Absorbed
													#79 (0.008 m; -0.062 m; 0.103 m)	0.0493181	0.006	Absorbed
													#80 (0.009 m; -0.062 m; 0.103 m)	0.0508217	0.006	Absorbed
													#81 (0.010 m; -0.062 m; 0.103 m)	0.0524384	0.007	Absorbed
													#82 (0.012 m; -0.062 m; 0.103 m)	0.00760593	0.002	Absorbed
													#83 (0.013 m; -0.062 m; 0.103 m)	0.423151	0.447	Absorbed
													#84 (-6.946e-04 m; -0.060 m; 0.103 m)	0.0498563	0.004	Absorbed
													#85 (-0.002 m; -0.060 m; 0.103 m)	0.0494779	0.004	Absorbed
													#86 (-0.003 m; -0.060 m; 0.103 m)	0.049316	0.004	Absorbed
													#87 (-0.005 m; -0.060 m; 0.103 m)	0.0490582	0.005	Absorbed
													#88 (-0.006 m; -0.060 m; 0.103 m)	0.0485553	0.005	Absorbed
													#89 (-0.007 m; -0.060 m; 0.103 m)	0.0481467	0.005	Absorbed
													#90 (-0.009 m; -0.060 m; 0.103 m)	0.0482782	0.005	Absorbed
													#91 (-0.010 m; -0.060 m; 0.103 m)	0.0498472	0.006	Absorbed
													#92 (-0.011 m; -0.060 m; 0.103 m)	0.049097	0.007	Absorbed
													#93 (-0.012 m; -0.060 m; 0.103 m)	0.00447482	0.002	Absorbed
													#94 (-0.014 m; -0.060 m; 0.103 m)	0.00752726	0.003	Absorbed
													#95 (6.150e-04 m; -0.060 m; 0.103 m)	0.0498439	0.004	Absorbed
													#96 (0.002 m; -0.060 m; 0.103 m)	0.0495991	0.004	Absorbed
													#97 (0.003 m; -0.060 m; 0.103 m)	0.0494404	0.005	Absorbed
													#98 (0.005 m; -0.060 m; 0.103 m)	0.0491594	0.005	Absorbed
													#99 (0.006 m; -0.060 m; 0.103 m)	0.0485375	0.005	Absorbed
													#100 (0.007 m; -0.060 m; 0.103 m)	0.0488234	0.006	Absorbed
													#101 (0.008 m; -0.060 m; 0.103 m)	0.0500241	0.006	Absorbed
														Total Filtration		0.108911
														Potentially Escaped		0.0792079

## Sheet: 5um Mouth Breathing
	Injection 19						Injection 20						Injection 21
	5um Mouth Breathing with total of 25 Injection points						5um Mouth Breathing with total of 50 Injection points						5um Mouth Breathing with total of 100 Injection points
	Initial Injection Location	Total Distance [m]	Residence Time [s]	Result (Particle Fate)			Initial Injection Location	Total Distance [m]	Residence Time [s]	Result (Particle Fate)			Initial Injection Location	Total Distance [m]	Residence Time [s]	Result (Particle Fate)
	#1 (-6.946e-04 m; -0.065 m; 0.103 m)	0.0880629	0.058	Opening			#1 (-6.946e-04 m; -0.066 m; 0.103 m)	0.0876087	0.06	Opening			#1 (-6.946e-04 m; -0.066 m; 0.103 m)	0.0875279	0.06	Opening
	#2 (-0.003 m; -0.065 m; 0.103 m)	0.0877174	0.062	Opening			#2 (-0.003 m; -0.066 m; 0.103 m)	0.0872903	0.063	Opening			#2 (-0.002 m; -0.066 m; 0.103 m)	0.0873232	0.062	Opening
	#3 (-0.005 m; -0.065 m; 0.103 m)	0.0872932	0.07	Opening			#3 (-0.005 m; -0.066 m; 0.103 m)	0.0869194	0.072	Opening			#3 (-0.003 m; -0.066 m; 0.103 m)	0.087145	0.065	Opening
	#4 (-0.007 m; -0.065 m; 0.103 m)	0.0868336	0.088	Opening			#4 (-0.007 m; -0.066 m; 0.103 m)	0.0865364	0.091	Opening			#4 (-0.005 m; -0.066 m; 0.103 m)	0.0869142	0.071	Opening
	#5 (-0.010 m; -0.065 m; 0.103 m)	0.0875102	0.132	Opening			#5 (-0.009 m; -0.066 m; 0.103 m)	0.0869847	0.135	Opening			#5 (-0.006 m; -0.066 m; 0.103 m)	0.0866845	0.079	Opening
	#6 (-0.012 m; -0.065 m; 0.103 m)	0.0887902	0.207	Opening			#6 (-0.011 m; -0.066 m; 0.103 m)	0.0880953	0.201	Opening			#6 (-0.007 m; -0.066 m; 0.103 m)	0.0864585	0.093	Opening
	#7 (-0.014 m; -0.065 m; 0.103 m)	0.0905065	0.284	Opening			#7 (0.001 m; -0.066 m; 0.103 m)	0.0875699	0.063	Opening			#7 (-0.009 m; -0.066 m; 0.103 m)	0.0864953	0.118	Opening
	#8 (0.002 m; -0.065 m; 0.103 m)	0.0880084	0.062	Opening			#8 (0.004 m; -0.066 m; 0.103 m)	0.0872162	0.071	Opening			#8 (-0.010 m; -0.066 m; 0.103 m)	0.0870367	0.152	Opening
	#9 (0.004 m; -0.065 m; 0.103 m)	0.0875763	0.069	Opening			#9 (0.006 m; -0.066 m; 0.103 m)	0.0866082	0.088	Opening			#9 (6.150e-04 m; -0.066 m; 0.103 m)	0.0875921	0.061	Opening
	#10 (0.006 m; -0.065 m; 0.103 m)	0.08687	0.087	Opening			#10 (0.008 m; -0.066 m; 0.103 m)	0.0874701	0.125	Opening			#10 (0.002 m; -0.066 m; 0.103 m)	0.0874277	0.065	Opening
	#11 (0.008 m; -0.065 m; 0.103 m)	0.0873998	0.125	Opening			#11 (0.010 m; -0.066 m; 0.103 m)	0.0907267	0.174	Opening			#11 (0.003 m; -0.066 m; 0.103 m)	0.0872231	0.069	Opening
	#12 (0.010 m; -0.065 m; 0.103 m)	0.0913315	0.179	Opening			#12 (0.012 m; -0.066 m; 0.103 m)	0.0946759	0.294	Opening			#12 (0.005 m; -0.066 m; 0.103 m)	0.0868947	0.077	Opening
	#13 (0.013 m; -0.065 m; 0.103 m)	0.0955109	0.307	Opening			#13 (-6.946e-04 m; -0.064 m; 0.103 m)	0.0885656	0.058	Opening			#13 (0.006 m; -0.066 m; 0.103 m)	0.086529	0.091	Opening
	#14 (4.097e-04 m; -0.061 m; 0.103 m)	0.0905456	0.064	Opening			#14 (-0.003 m; -0.064 m; 0.103 m)	0.088212	0.061	Opening			#14 (0.007 m; -0.066 m; 0.103 m)	0.0866374	0.112	Opening
	#15 (-0.002 m; -0.061 m; 0.103 m)	0.0902351	0.064	Opening			#15 (-0.005 m; -0.064 m; 0.103 m)	0.0877466	0.068	Opening			#15 (0.008 m; -0.066 m; 0.103 m)	0.0881656	0.137	Opening
	#16 (-0.004 m; -0.061 m; 0.103 m)	0.0896415	0.067	Opening			#16 (-0.007 m; -0.064 m; 0.103 m)	0.0872311	0.083	Opening			#16 (0.010 m; -0.066 m; 0.103 m)	0.0902978	0.167	Opening
	#17 (-0.006 m; -0.061 m; 0.103 m)	0.0888771	0.076	Opening			#17 (-0.009 m; -0.064 m; 0.103 m)	0.0874808	0.121	Opening			#17 (0.011 m; -0.066 m; 0.103 m)	0.0925907	0.217	Opening
	#18 (-0.008 m; -0.061 m; 0.103 m)	0.0880396	0.1	Opening			#18 (-0.011 m; -0.064 m; 0.103 m)	0.0895666	0.187	Opening			#18 (0.012 m; -0.066 m; 0.103 m)	0.0943112	0.314	Opening
	#19 (-0.011 m; -0.061 m; 0.103 m)	0.0892132	0.151	Opening			#19 (-0.014 m; -0.064 m; 0.103 m)	0.0904492	0.264	Opening			#19 (-3.982e-05 m; -0.065 m; 0.103 m)	0.0883828	0.058	Opening
	#20 (-0.013 m; -0.061 m; 0.103 m)	0.0917127	0.205	Opening			#20 (0.001 m; -0.064 m; 0.103 m)	0.0884948	0.061	Opening			#20 (-0.001 m; -0.065 m; 0.103 m)	0.0881349	0.059	Opening
	#21 (0.003 m; -0.061 m; 0.103 m)	0.089996	0.068	Opening			#21 (0.004 m; -0.064 m; 0.103 m)	0.0880673	0.068	Opening			#21 (-0.003 m; -0.065 m; 0.103 m)	0.0879319	0.061	Opening
	#22 (0.005 m; -0.061 m; 0.103 m)	0.0891948	0.077	Opening			#22 (0.006 m; -0.064 m; 0.103 m)	0.0872898	0.082	Opening			#22 (-0.004 m; -0.065 m; 0.103 m)	0.0876954	0.064	Opening
	#23 (0.007 m; -0.061 m; 0.103 m)	0.0881476	0.1	Opening			#23 (0.008 m; -0.064 m; 0.103 m)	0.0872441	0.115	Opening			#23 (-0.005 m; -0.065 m; 0.103 m)	0.087424	0.07	Opening
	#24 (0.009 m; -0.061 m; 0.103 m)	0.0901207	0.139	Opening			#24 (0.010 m; -0.064 m; 0.103 m)	0.0908039	0.167	Opening			#24 (-0.007 m; -0.065 m; 0.103 m)	0.0871455	0.079	Opening
	#25 (0.011 m; -0.061 m; 0.103 m)	0.0943403	0.209	Opening			#25 (0.012 m; -0.064 m; 0.103 m)	0.0955197	0.257	Opening			#25 (-0.008 m; -0.065 m; 0.103 m)	0.0868416	0.096	Opening
		Total Filtration		1			#26 (-6.946e-04 m; -0.062 m; 0.103 m)	0.0897473	0.061	Opening			#26 (-0.009 m; -0.065 m; 0.103 m)	0.0873101	0.122	Opening
							#27 (-0.003 m; -0.062 m; 0.103 m)	0.0892818	0.063	Opening			#27 (-0.011 m; -0.065 m; 0.103 m)	0.0885658	0.159	Opening
							#28 (-0.005 m; -0.062 m; 0.103 m)	0.0887328	0.068	Opening			#28 (-0.012 m; -0.065 m; 0.103 m)	0.0891054	0.208	Opening
							#29 (-0.007 m; -0.062 m; 0.103 m)	0.0880572	0.082	Opening			#29 (-0.013 m; -0.065 m; 0.103 m)	0.0898675	0.255	Opening
							#30 (-0.009 m; -0.062 m; 0.103 m)	0.0875795	0.117	Opening			#30 (-0.014 m; -0.065 m; 0.103 m)	0.0911572	0.294	Opening
							#31 (-0.011 m; -0.062 m; 0.103 m)	0.0903456	0.17	Opening			#31 (0.001 m; -0.065 m; 0.103 m)	0.0882219	0.061	Opening
							#32 (-0.014 m; -0.062 m; 0.103 m)	0.0915138	0.239	Opening			#32 (0.003 m; -0.065 m; 0.103 m)	0.0880046	0.065	Opening
							#33 (0.001 m; -0.062 m; 0.103 m)	0.0896048	0.063	Opening			#33 (0.004 m; -0.065 m; 0.103 m)	0.0876944	0.07	Opening
							#34 (0.004 m; -0.062 m; 0.103 m)	0.0890984	0.069	Opening			#34 (0.005 m; -0.065 m; 0.103 m)	0.0872607	0.078	Opening
							#35 (0.006 m; -0.062 m; 0.103 m)	0.0881427	0.082	Opening			#35 (0.007 m; -0.065 m; 0.103 m)	0.0868369	0.093	Opening
							#36 (0.008 m; -0.062 m; 0.103 m)	0.0880343	0.112	Opening			#36 (0.008 m; -0.065 m; 0.103 m)	0.087022	0.116	Opening
							#37 (0.010 m; -0.062 m; 0.103 m)	0.00209071	0.019	Opening			#37 (0.009 m; -0.065 m; 0.103 m)	0.0892142	0.145	Opening
							#38 (0.012 m; -0.062 m; 0.103 m)	0.0955974	0.245	Opening			#38 (0.010 m; -0.065 m; 0.103 m)	0.0914886	0.18	Opening
							#39 (-6.946e-04 m; -0.060 m; 0.103 m)	0.0913957	0.069	Opening			#39 (0.012 m; -0.065 m; 0.103 m)	0.0940506	0.236	Opening
							#40 (-0.003 m; -0.060 m; 0.103 m)	0.0908684	0.069	Opening			#40 (0.013 m; -0.065 m; 0.103 m)	0.0955556	0.351	Opening
							#41 (-0.005 m; -0.060 m; 0.103 m)	0.0900909	0.072	Opening			#41 (-6.946e-04 m; -0.063 m; 0.103 m)	0.0891367	0.059	Opening
							#42 (-0.007 m; -0.060 m; 0.103 m)	0.0891302	0.085	Opening			#42 (-0.002 m; -0.063 m; 0.103 m)	0.0888856	0.06	Opening
							#43 (-0.009 m; -0.060 m; 0.103 m)	0.088483	0.123	Opening			#43 (-0.003 m; -0.063 m; 0.103 m)	0.0886355	0.062	Opening
							#44 (-0.011 m; -0.060 m; 0.103 m)	0.0903012	0.173	Opening			#44 (-0.005 m; -0.063 m; 0.103 m)	0.0883192	0.066	Opening
							#45 (-0.014 m; -0.060 m; 0.103 m)	0.0921012	0.214	Opening			#45 (-0.006 m; -0.063 m; 0.103 m)	0.0879772	0.072	Opening
							#46 (0.001 m; -0.060 m; 0.103 m)	0.0911985	0.07	Opening			#46 (-0.007 m; -0.063 m; 0.103 m)	0.0875981	0.083	Opening
							#47 (0.004 m; -0.060 m; 0.103 m)	0.0904929	0.075	Opening			#47 (-0.009 m; -0.063 m; 0.103 m)	0.0872182	0.103	Opening
							#48 (0.006 m; -0.060 m; 0.103 m)	0.0894778	0.086	Opening			#48 (-0.010 m; -0.063 m; 0.103 m)	0.0880089	0.132	Opening
							#49 (0.008 m; -0.060 m; 0.103 m)	0.0896069	0.117	Opening			#49 (-0.011 m; -0.063 m; 0.103 m)	0.0897817	0.166	Opening
							#50 (0.010 m; -0.060 m; 0.103 m)	0.0018854	0.022	Opening			#50 (-0.012 m; -0.063 m; 0.103 m)	0.0905931	0.214	Opening
								Total Filtration		1			#51 (-0.014 m; -0.063 m; 0.103 m)	0.0910598	0.256	Opening
													#52 (6.150e-04 m; -0.063 m; 0.103 m)	0.0891855	0.06	Opening
													#53 (0.002 m; -0.063 m; 0.103 m)	0.088934	0.063	Opening
													#54 (0.003 m; -0.063 m; 0.103 m)	0.0886783	0.066	Opening
													#55 (0.005 m; -0.063 m; 0.103 m)	0.088236	0.072	Opening
													#56 (0.006 m; -0.063 m; 0.103 m)	0.0876647	0.083	Opening
													#57 (0.007 m; -0.063 m; 0.103 m)	0.0872135	0.1	Opening
													#58 (0.008 m; -0.063 m; 0.103 m)	0.0882255	0.123	Opening
													#59 (0.010 m; -0.063 m; 0.103 m)	0.0906047	0.156	Opening
													#60 (0.011 m; -0.063 m; 0.103 m)	0.0930639	0.197	Opening
													#61 (0.012 m; -0.063 m; 0.103 m)	0.0960173	0.262	Opening
													#62 (-3.982e-05 m; -0.062 m; 0.103 m)	0.0903218	0.062	Opening
													#63 (-0.001 m; -0.062 m; 0.103 m)	0.0900189	0.063	Opening
													#64 (-0.003 m; -0.062 m; 0.103 m)	0.0897097	0.064	Opening
													#65 (-0.004 m; -0.062 m; 0.103 m)	0.0893785	0.066	Opening
													#66 (-0.005 m; -0.062 m; 0.103 m)	0.088988	0.07	Opening
													#67 (-0.007 m; -0.062 m; 0.103 m)	0.0885562	0.077	Opening
													#68 (-0.008 m; -0.062 m; 0.103 m)	0.088048	0.091	Opening
													#69 (-0.009 m; -0.062 m; 0.103 m)	0.0877485	0.115	Opening
													#70 (-0.011 m; -0.062 m; 0.103 m)	0.0890048	0.147	Opening
													#71 (-0.012 m; -0.062 m; 0.103 m)	0.0908632	0.179	Opening
													#72 (-0.013 m; -0.062 m; 0.103 m)	0.091701	0.217	Opening
													#73 (-0.014 m; -0.062 m; 0.103 m)	0.0921939	0.254	Opening
													#74 (0.001 m; -0.062 m; 0.103 m)	0.0900519	0.064	Opening
													#75 (0.003 m; -0.062 m; 0.103 m)	0.0897336	0.067	Opening
													#76 (0.004 m; -0.062 m; 0.103 m)	0.0893417	0.071	Opening
													#77 (0.005 m; -0.062 m; 0.103 m)	0.088778	0.078	Opening
													#78 (0.007 m; -0.062 m; 0.103 m)	0.0879987	0.092	Opening
													#79 (0.008 m; -0.062 m; 0.103 m)	0.0884719	0.111	Opening
													#80 (0.009 m; -0.062 m; 0.103 m)	0.0897746	0.135	Opening
													#81 (0.010 m; -0.062 m; 0.103 m)	0.00190632	0.019	Opening
													#82 (0.012 m; -0.062 m; 0.103 m)	0.0950028	0.22	Opening
													#83 (0.013 m; -0.062 m; 0.103 m)	0.0984822	0.307	Opening
													#84 (-6.946e-04 m; -0.060 m; 0.103 m)	0.0915795	0.07	Opening
													#85 (-0.002 m; -0.060 m; 0.103 m)	0.0913085	0.07	Opening
													#86 (-0.003 m; -0.060 m; 0.103 m)	0.0909329	0.071	Opening
													#87 (-0.005 m; -0.060 m; 0.103 m)	0.0904361	0.072	Opening
													#88 (-0.006 m; -0.060 m; 0.103 m)	0.0898477	0.077	Opening
													#89 (-0.007 m; -0.060 m; 0.103 m)	0.089217	0.087	Opening
													#90 (-0.009 m; -0.060 m; 0.103 m)	0.0886305	0.11	Opening
													#91 (-0.010 m; -0.060 m; 0.103 m)	0.0889324	0.139	Opening
													#92 (-0.011 m; -0.060 m; 0.103 m)	0.0900738	0.168	Opening
													#93 (-0.012 m; -0.060 m; 0.103 m)	0.0913584	0.192	Opening
													#94 (-0.014 m; -0.060 m; 0.103 m)	0.0922235	0.216	Opening
													#95 (6.150e-04 m; -0.060 m; 0.103 m)	0.0915889	0.07	Opening
													#96 (0.002 m; -0.060 m; 0.103 m)	0.0912668	0.072	Opening
													#97 (0.003 m; -0.060 m; 0.103 m)	0.0907867	0.075	Opening
													#98 (0.005 m; -0.060 m; 0.103 m)	0.090308	0.079	Opening
													#99 (0.006 m; -0.060 m; 0.103 m)	0.0896031	0.087	Opening
													#100 (0.007 m; -0.060 m; 0.103 m)	0.0891371	0.103	Opening
													#101 (0.008 m; -0.060 m; 0.103 m)	0.00118574	0.014	Opening
														Total Filtration		1

[truncated: 9 more sheets: 5um Speaking, 5um Coughing, 10um Mouth Breathing, 10um Speaking, 10um Coughing, 20um Mouth Breathing, 20um Speaking, 20um Coughing, Summary]
