# Supplementary figures and images for: Infectious Aerosol Capture Mask as Environmental Control to Reduce Spread of Respiratory Viral Particles
Source: MDPI journal article supplement (doi:10.3390/v14061275), 2022-06-11

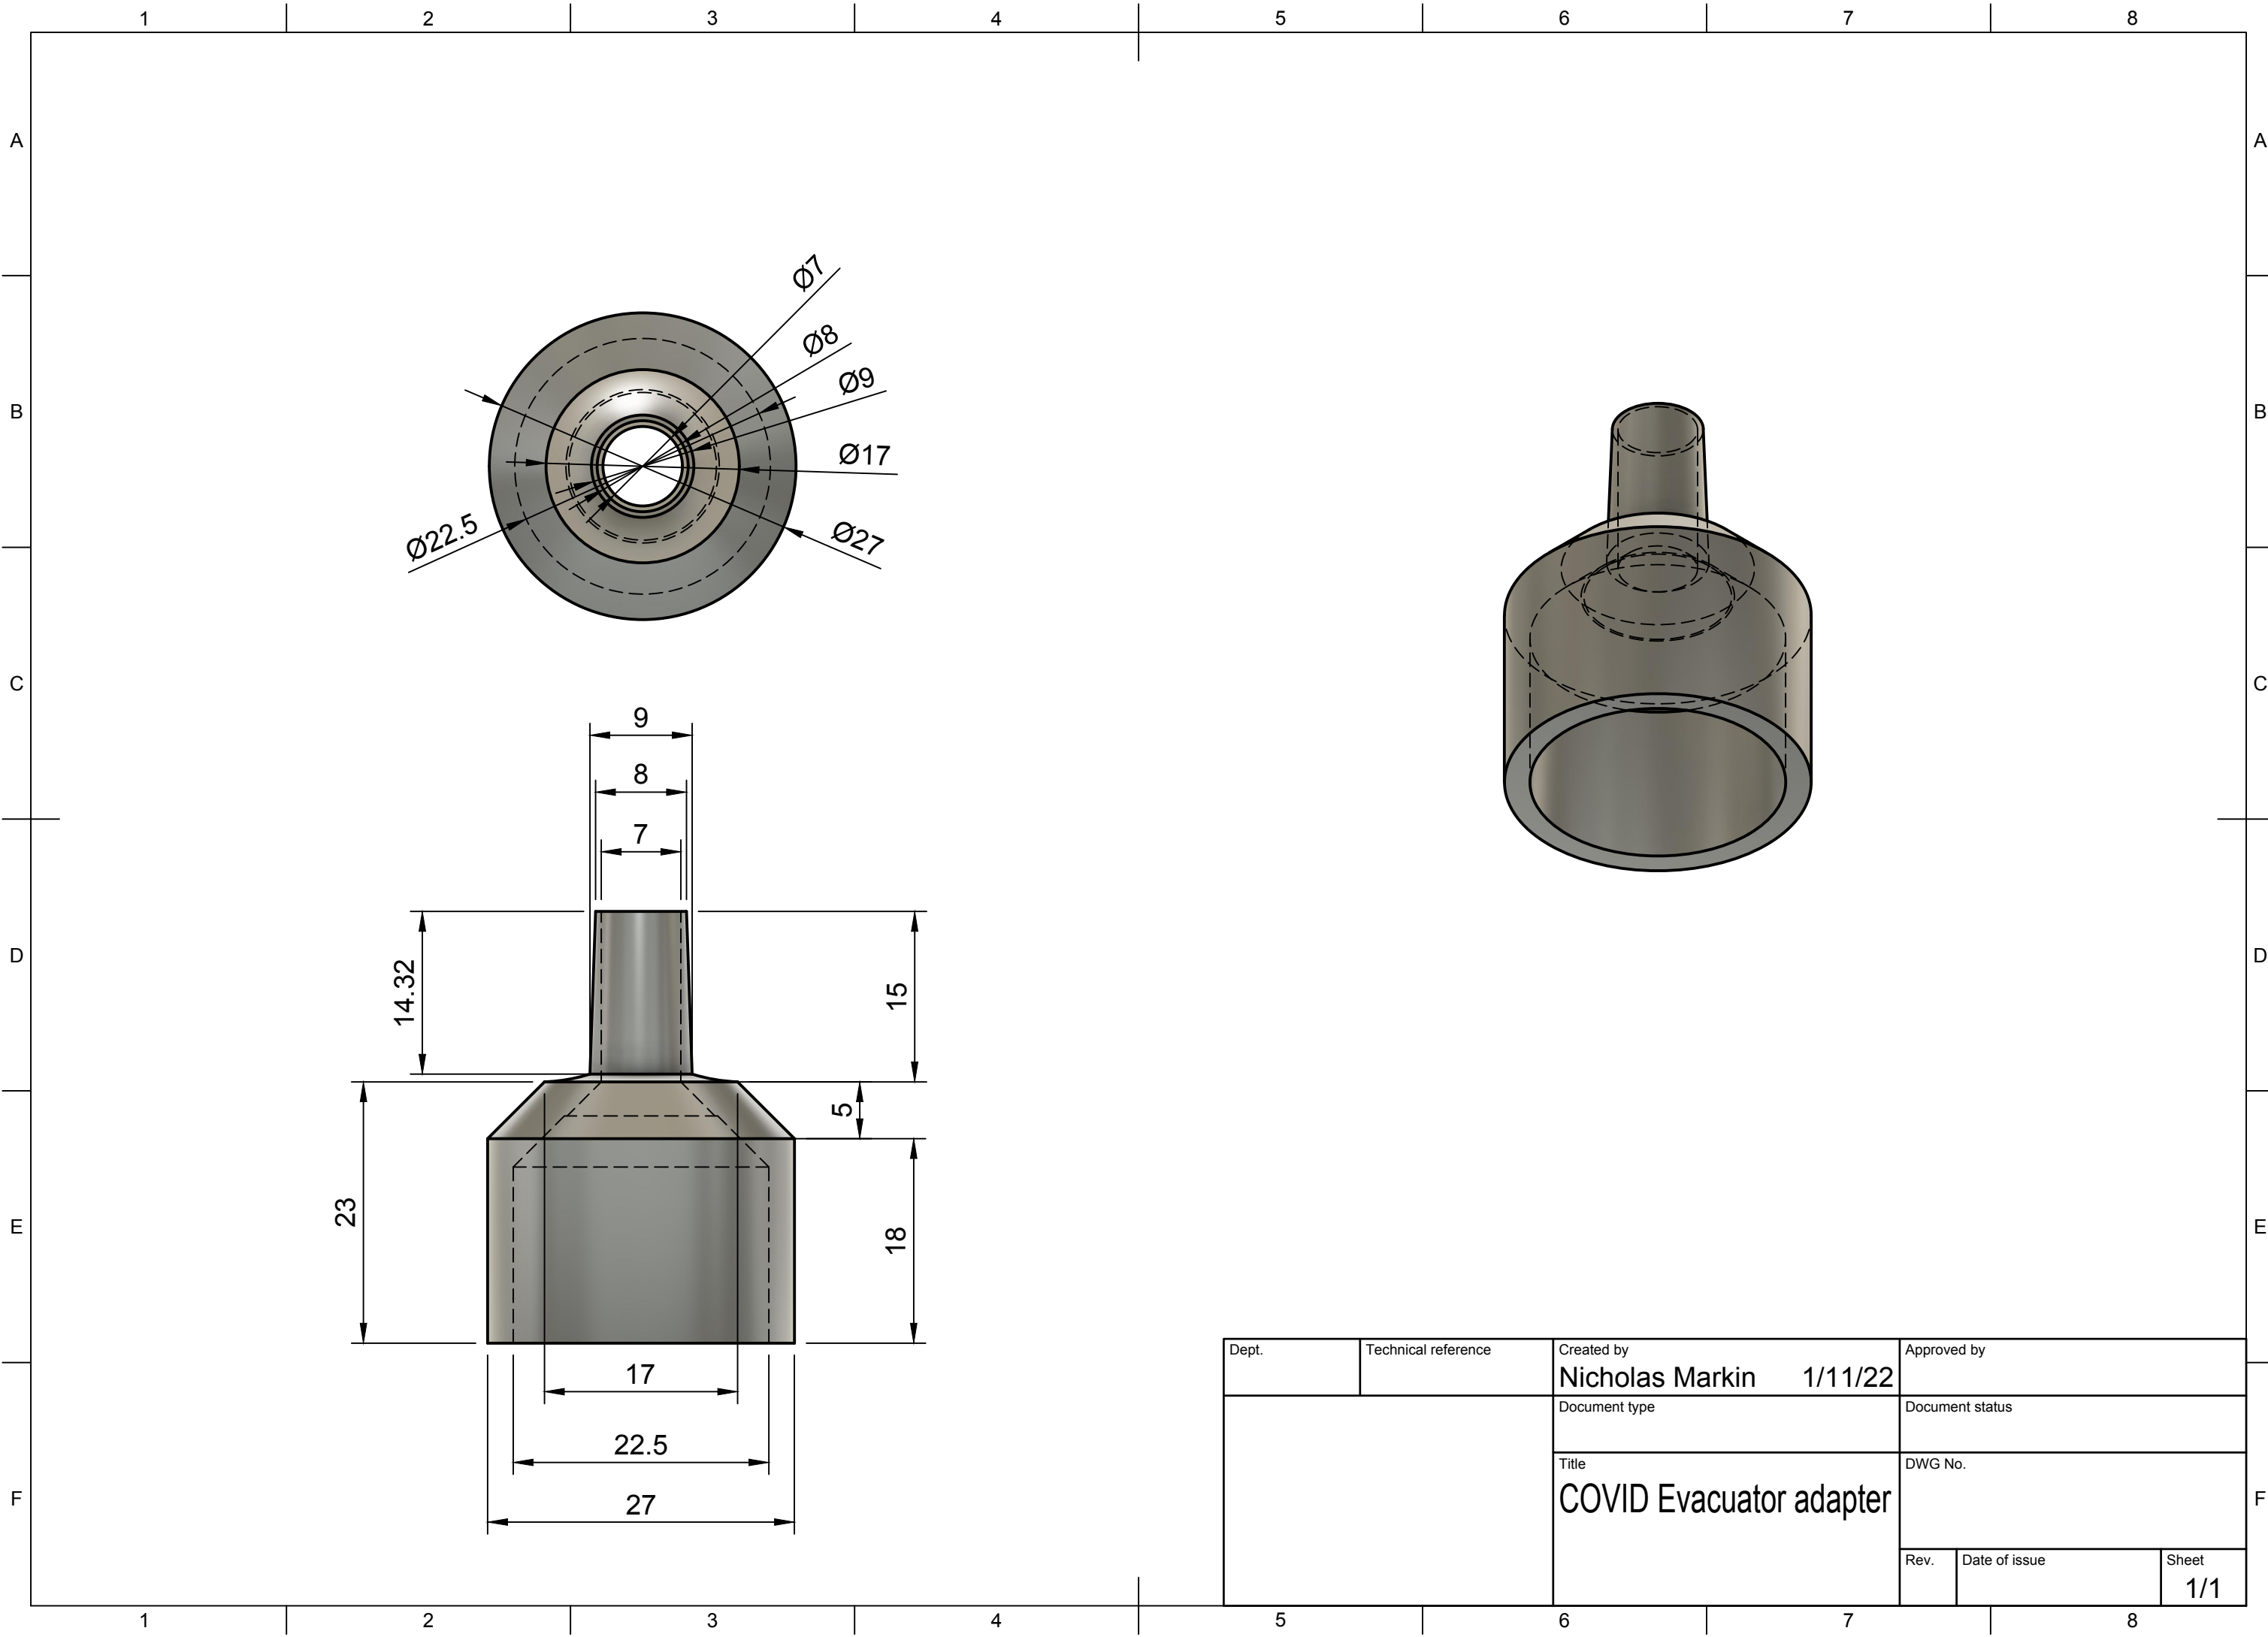

Supplement: s1 [file s1]
